# Supplementary material for: Structure–Activity Relationship Studies on Highly Functionalized Pyrazole Hydrazones and Amides as Antiproliferative and Antioxidant Agents
Source: MDPI journal article supplement (doi:10.3390/ijms25094607), 2024-04-23
Supplement: s1 [file s1]

# Supporting Information

## Structure-activity relationship studies on highly functionalized pyrazole hydrazones and amides as antiproliferative and antioxidant agents

Matteo Lusardi <sup>1</sup>, Maria Grazia Signorello <sup>1</sup>, Eleonora Russo <sup>1</sup>, Debora Caviglia<sup>1</sup>, Marco Ponassi <sup>2</sup>, Erika Iervasi <sup>2</sup>, Camillo Rosano <sup>2</sup>, Chiara Brullo <sup>1</sup> and Andrea Spallarossa <sup>1,\*</sup>

<sup>1</sup> Department of Pharmacy, University of Genova, viale Benedetto XV, 3, 16132, Genova, Italy; matteo.lusardi@edu.unige.it (M.L.); mariagrazia.signorello@unige.it (M.G.S.); chiara.brullo@unige.it (C.B.); eleonora.russo@unige.it (E.R.); debora.caviglia@edu.unige.it (D.C.).

<sup>2</sup> Proteomics and Mass Spectrometry Unit, IRCCS Ospedale Policlinico San Martino, Largo R. Benzi 10, 16132, Genova, Italy; erika.iervasi@hsanmartino.it (E.I.); camillo.rosano@hsanmartino.it (C.R.); marco.ponassi@hsanmartino.it (M.P.).

\*Correspondence: andrea.spallarossa@unige.it

### Table of contents

**Figure S1.** <sup>1</sup>H-NMR (400 MHz, d<sub>6</sub>-DMSO) spectrum of compound **10a**

**Figure S2.** <sup>13</sup>C-NMR (101 MHz, d<sub>6</sub>-DMSO) spectrum of compound **10a**

**Figure S3.** <sup>1</sup>H-NMR (400 MHz, d<sub>6</sub>-DMSO) spectrum of compound **10b**

**Figure S4.** <sup>13</sup>C-NMR (101 MHz, d<sub>6</sub>-DMSO) spectrum of compound **10b**

**Figure S5.** <sup>1</sup>H-NMR (400 MHz, d<sub>6</sub>-DMSO) spectrum of compound **11a**

**Figure S6.** <sup>13</sup>C-NMR (101 MHz, d<sub>6</sub>-DMSO) spectrum of compound **11a**

**Figure S7.** <sup>1</sup>H-NMR (400 MHz, d<sub>6</sub>-DMSO) spectrum of compound **11b**

**Figure S8.** <sup>13</sup>C-NMR (101 MHz, d<sub>6</sub>-DMSO) spectrum of compound **11b**

**Figure S9.** <sup>1</sup>H-NMR (400 MHz, d<sub>6</sub>-DMSO) spectrum of compound **11c**

**Figure S10.** <sup>13</sup>C-NMR (101 MHz, d<sub>6</sub>-DMSO) spectrum of compound **11c**

**Figure S11.** <sup>1</sup>H-NMR (400 MHz, d<sub>6</sub>-DMSO) spectrum of compound **11d**

**Figure S12.** <sup>13</sup>C-NMR (101 MHz, d<sub>6</sub>-DMSO) spectrum of compound **11d**

**Figure S13.** <sup>1</sup>H-NMR (400 MHz, d<sub>6</sub>-DMSO) spectrum of compound **12a**

**Figure S14.**  $^{13}\text{C}$ -NMR (101 MHz,  $\text{d}_6$ -DMSO) spectrum of compound **12a**

**Figure S15.**  $^1\text{H}$ -NMR (400 MHz,  $\text{d}_6$ -DMSO) spectrum of compound **12b**

**Figure S16.**  $^{13}\text{C}$ -NMR (101 MHz,  $\text{d}_6$ -DMSO) spectrum of compound **12b**

**Figure S17.**  $^1\text{H}$ -NMR (400 MHz,  $\text{d}_6$ -DMSO) spectrum of compound **12c**

**Figure S18.**  $^{13}\text{C}$ -NMR (101 MHz,  $\text{d}_6$ -DMSO) spectrum of compound **12c**

**Figure S19.**  $^1\text{H}$ -NMR (400 MHz,  $\text{d}_6$ -DMSO) spectrum of compound **12d**

**Figure S20.**  $^{13}\text{C}$ -NMR (101 MHz,  $\text{d}_6$ -DMSO) spectrum of compound **12d**

**Figure S21.**  $^1\text{H}$ -NMR (400 MHz,  $\text{d}_6$ -DMSO) spectrum of compound **13a**

**Figure S22.**  $^{13}\text{C}$ -NMR (101 MHz,  $\text{d}_6$ -DMSO) spectrum of compound **13a**

**Figure S23.**  $^1\text{H}$ -NMR (400 MHz,  $\text{d}_6$ -DMSO) spectrum of compound **13b**

**Figure S24.**  $^{13}\text{C}$ -NMR (101 MHz,  $\text{d}_6$ -DMSO) spectrum of compound **13b**

**Figure S25.**  $^1\text{H}$ -NMR (400 MHz,  $\text{d}_6$ -DMSO) spectrum of compound **13c**

**Figure S26.**  $^{13}\text{C}$ -NMR (101 MHz,  $\text{d}_6$ -DMSO) spectrum of compound **13c**

**Figure S27.**  $^1\text{H}$ -NMR (400 MHz,  $\text{d}_6$ -DMSO) spectrum of compound **13d**

**Figure S28.**  $^{13}\text{C}$ -NMR (101 MHz,  $\text{d}_6$ -DMSO) spectrum of compound **13d**

**Figure S29.**  $^1\text{H}$ -NMR (400 MHz,  $\text{d}_6$ -DMSO) spectrum of compound **14**

**Figure S30.**  $^1\text{H}$ -NMR (400 MHz,  $\text{d}_6$ -DMSO) spectrum of compound **15**

**Figure S31.**  $^{13}\text{C}$ -NMR (101 MHz,  $\text{d}_6$ -DMSO) spectrum of compound **15**

**Figure S32.**  $^1\text{H}$ -NMR (400 MHz,  $\text{d}_6$ -DMSO) spectrum of compound **16**

**Figure S33.**  $^{13}\text{C}$ -NMR (101 MHz,  $\text{d}_6$ -DMSO) spectrum of compound **16**

**Figure S34.**  $^1\text{H}$ -NMR (400 MHz,  $\text{d}_6$ -DMSO) spectrum of compound **17**

**Figure S35.**  $^1\text{H}$ -NMR (400 MHz,  $\text{d}_6$ -DMSO) spectrum of compound **18**

**Figure S36.**  $^{13}\text{C}$ -NMR (101 MHz,  $\text{d}_6$ -DMSO) spectrum of compound **18**

**Figure S37.**  $^1\text{H}$ -NMR (400 MHz,  $\text{d}_6$ -DMSO) spectrum of compound **19**

**Figure S38.**  $^{13}\text{C}$ -NMR (101 MHz,  $\text{d}_6$ -DMSO) spectrum of compound **19**

**Figure S39.**  $^1\text{H}$ -NMR (400 MHz,  $\text{d}_6$ -DMSO) spectrum of compound **20**

**Figure S40.**  $^{13}\text{C}$ -NMR (101 MHz,  $\text{d}_6$ -DMSO) spectrum of compound **20**

**Figure S41.**  $^1\text{H}$ -NMR (400 MHz,  $\text{d}_6$ -DMSO) spectrum of compound **21**

**Figure S42.**  $^{13}\text{C}$ -NMR (101 MHz,  $\text{d}_6$ -DMSO) spectrum of compound **21**

**Figure S43.**  $^1\text{H}$ -NMR (400 MHz,  $\text{d}_6$ -DMSO) spectrum of compound **22**

**Figure S44.**  $^{13}\text{C}$ -NMR (101 MHz,  $\text{d}_6$ -DMSO) spectrum of compound **22**

**Table S1.** Inhibitory effect of compounds **10-22** on platelet aggregation and ROS production

**Figure S1.**  $^1\text{H}$ -NMR (400 MHz,  $\text{d}_6$ -DMSO) spectrum of compound **10a**

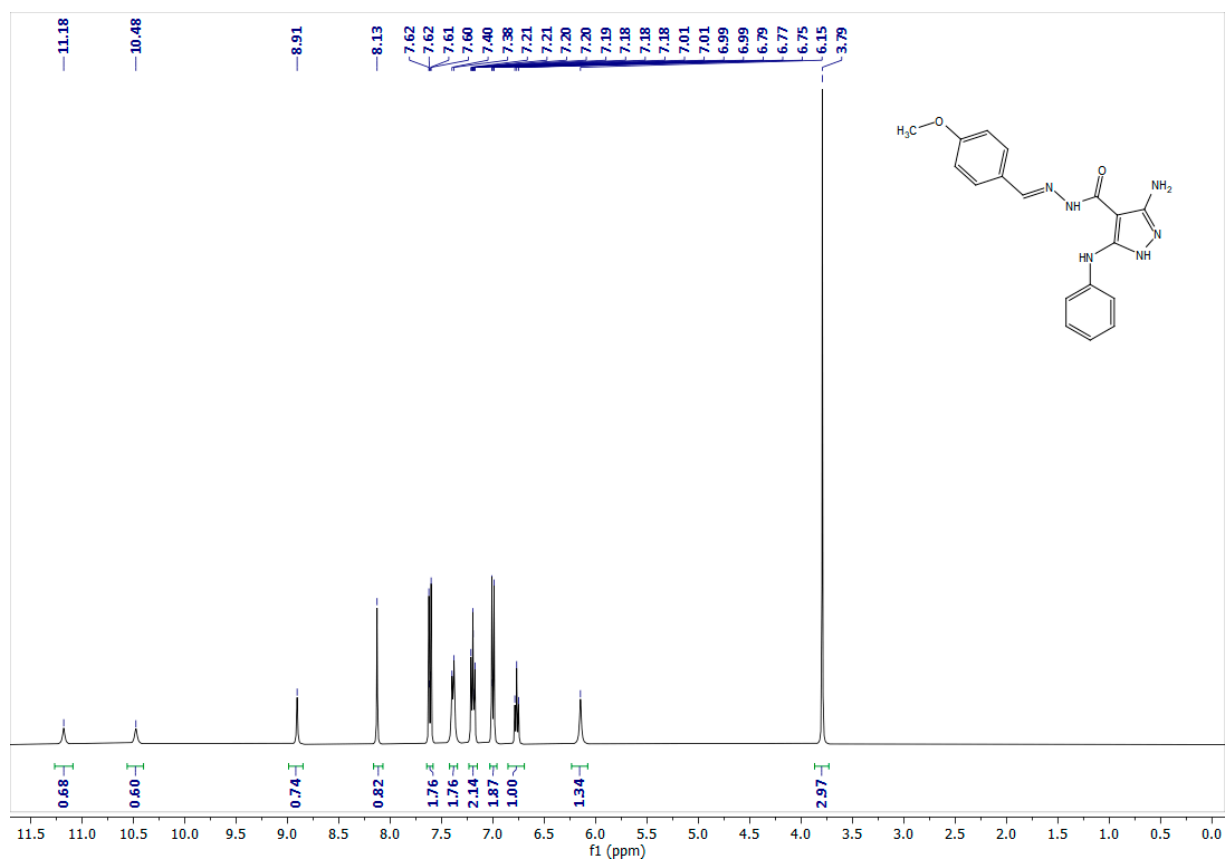

**Figure S2.**  $^{13}\text{C}$ -NMR (101 MHz,  $\text{d}_6$ -DMSO) spectrum of compound **10a**

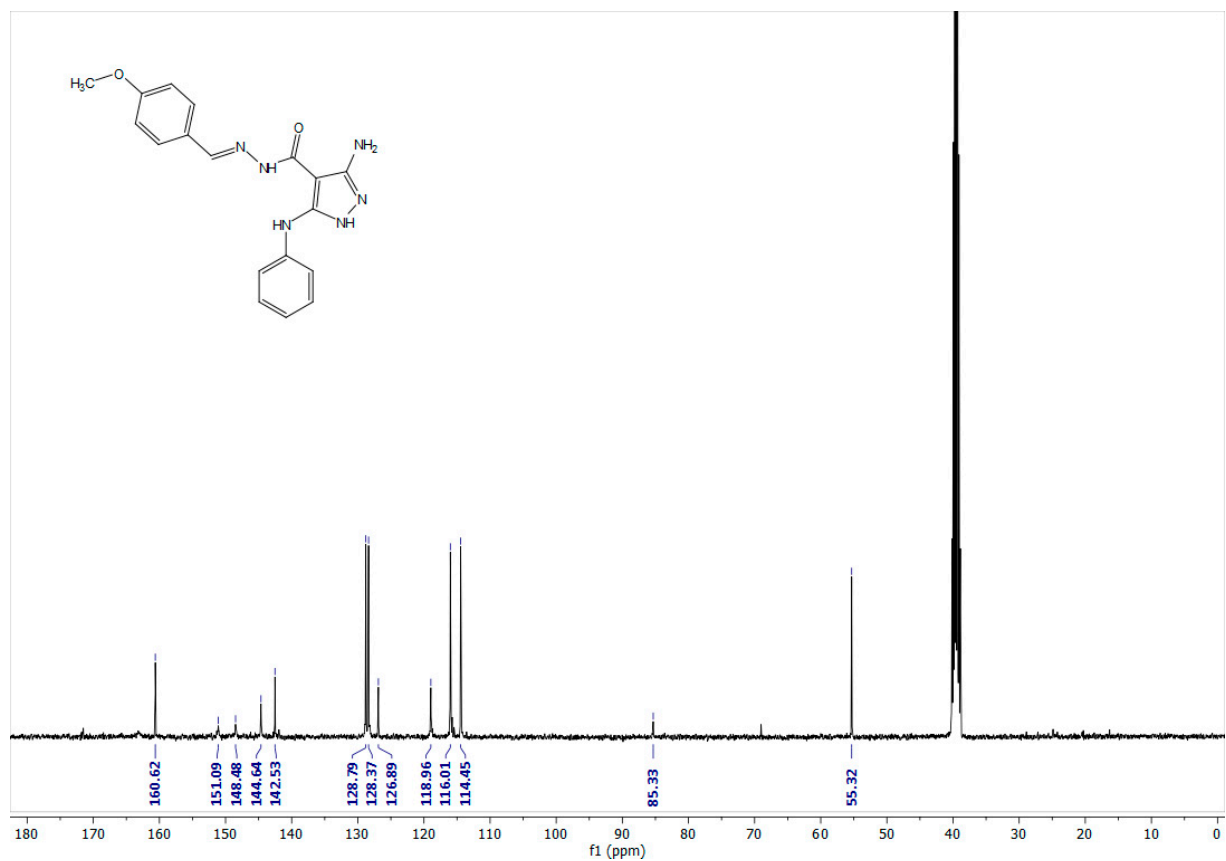

**Figure S3.**  $^1\text{H}$ -NMR (400 MHz,  $\text{d}_6$ -DMSO) spectrum of compound **10b**

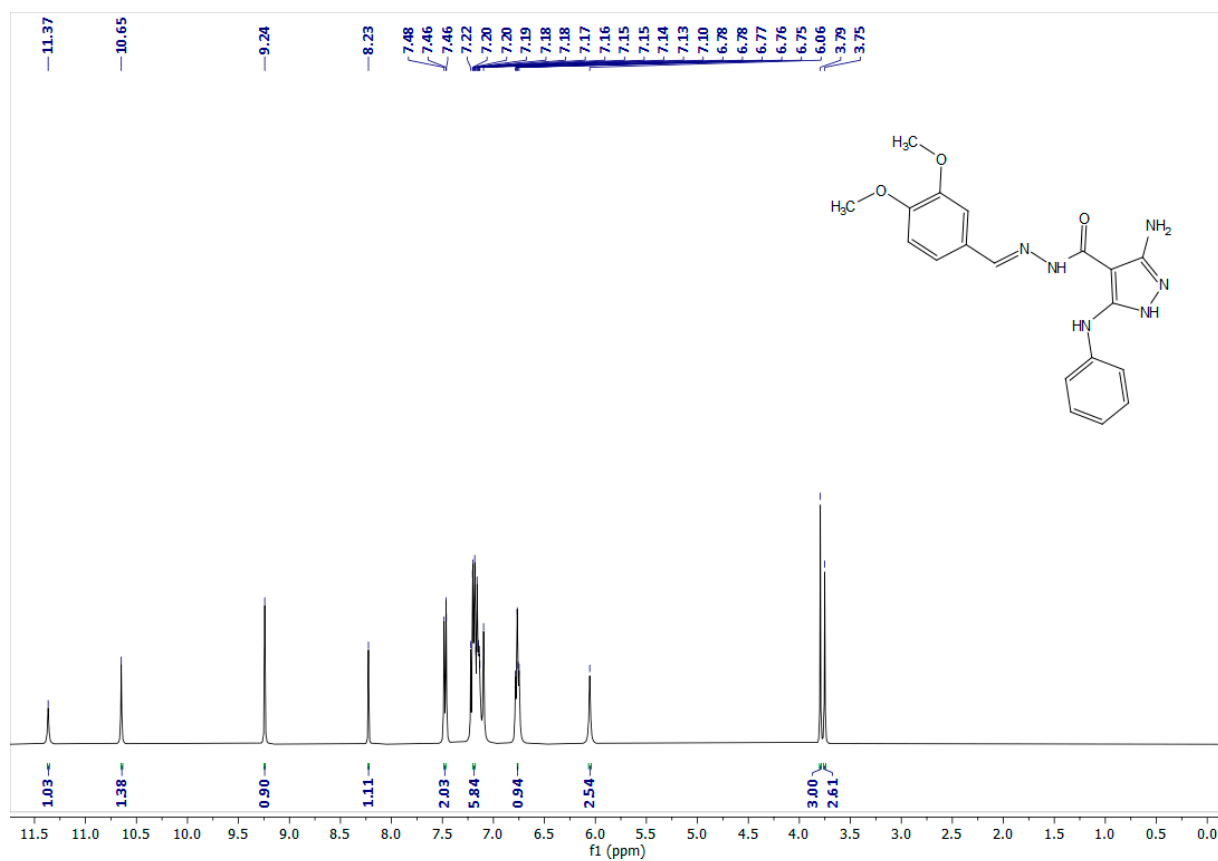

**Figure S4.**  $^{13}\text{C}$ -NMR (101 MHz,  $\text{d}_6$ -DMSO) spectrum of compound **10b**

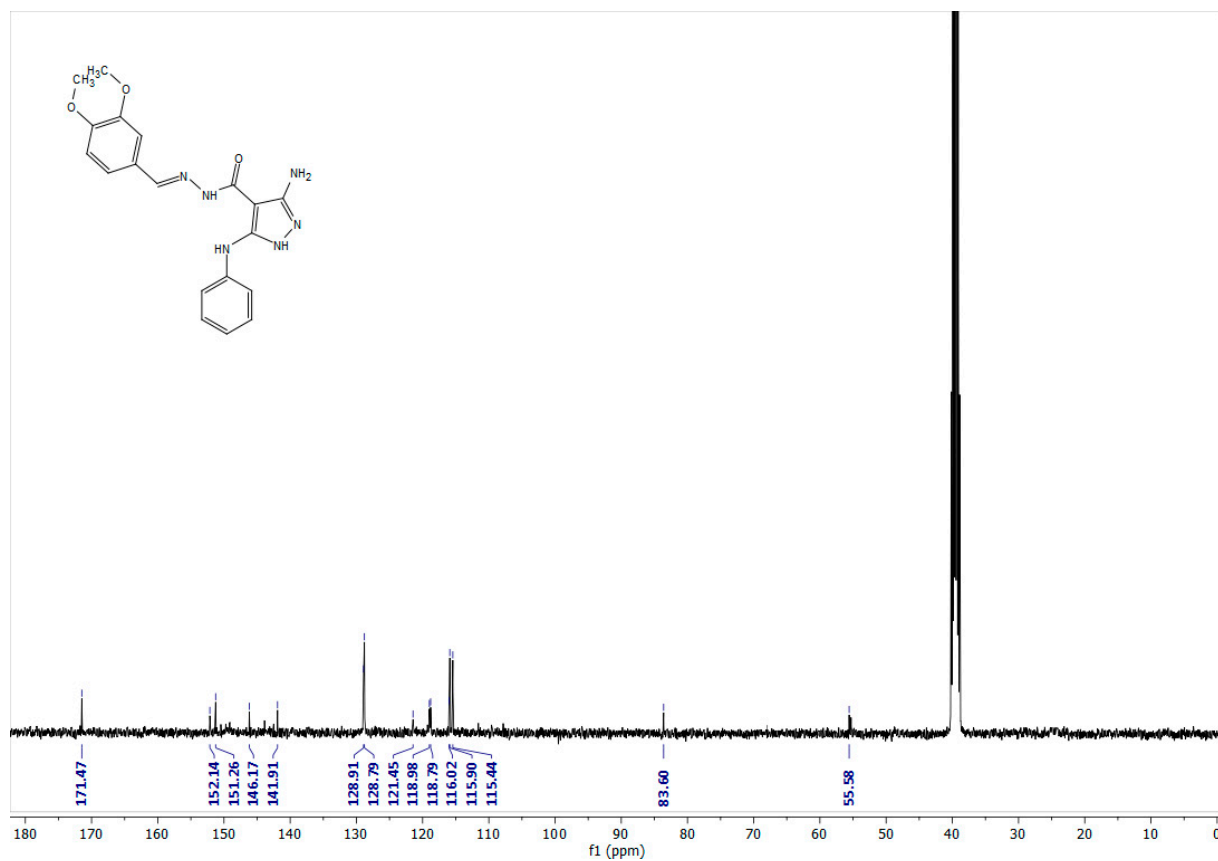

**Figure S5.**  $^1\text{H}$ -NMR (400 MHz,  $\text{d}_6$ -DMSO) spectrum of compound **11a**

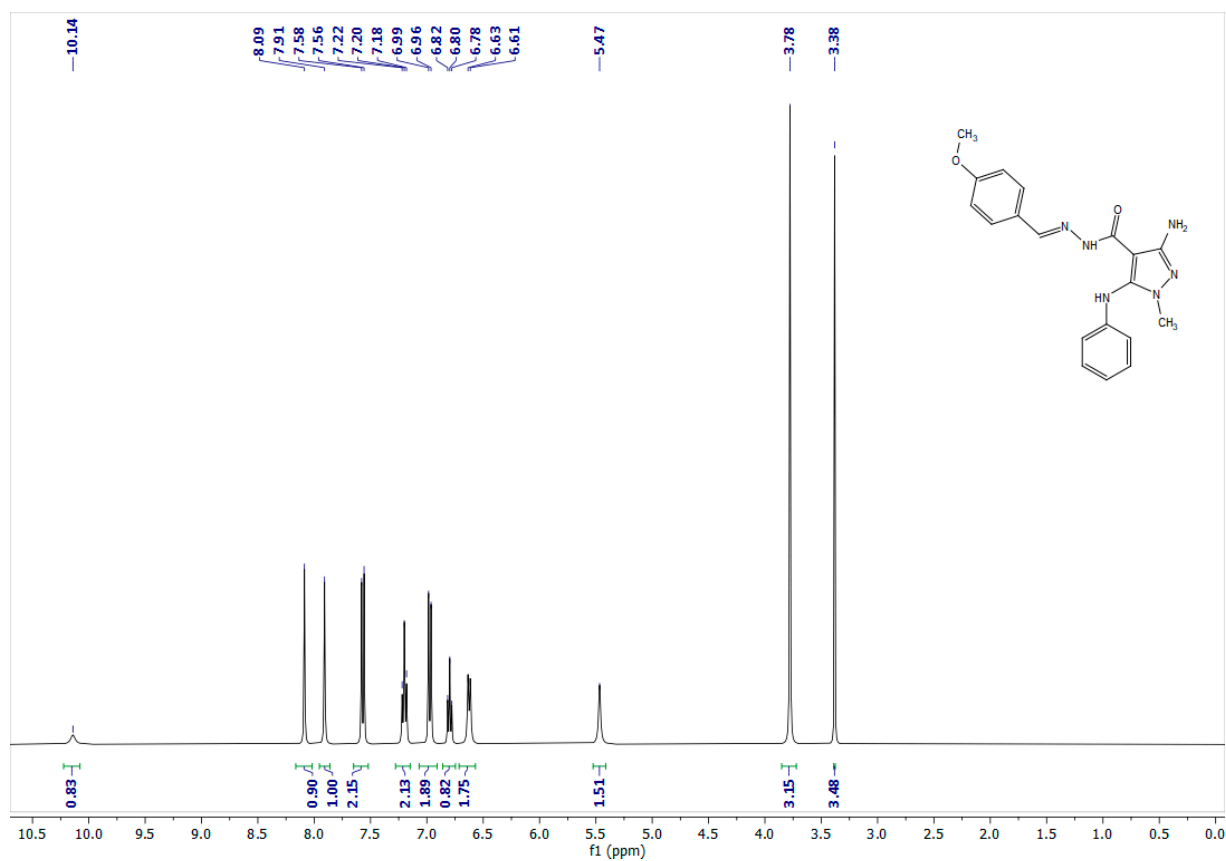

**Figure S6.**  $^{13}\text{C}$ -NMR (101 MHz,  $\text{d}_6$ -DMSO) spectrum of compound **11a**

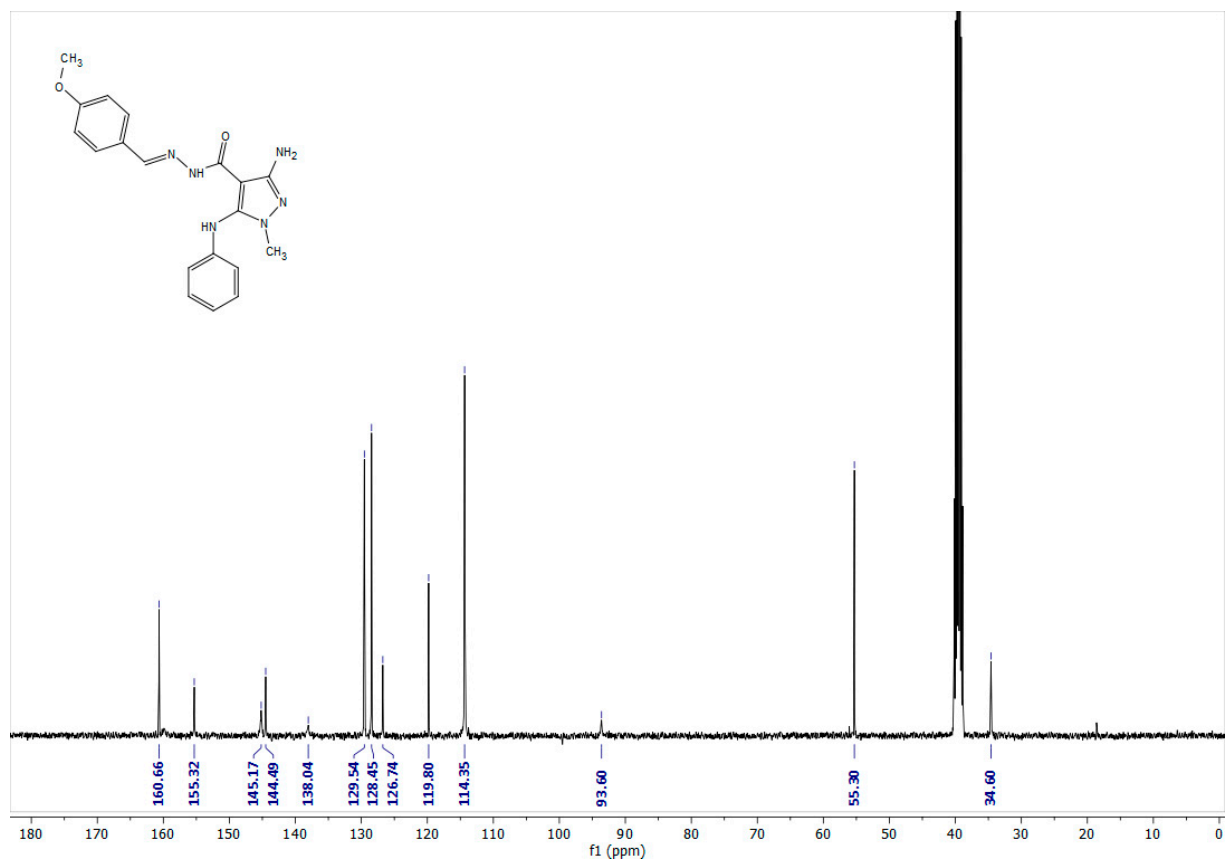

**Figure S7.**  $^1\text{H}$ -NMR (400 MHz,  $\text{d}_6$ -DMSO) spectrum of compound **11b**

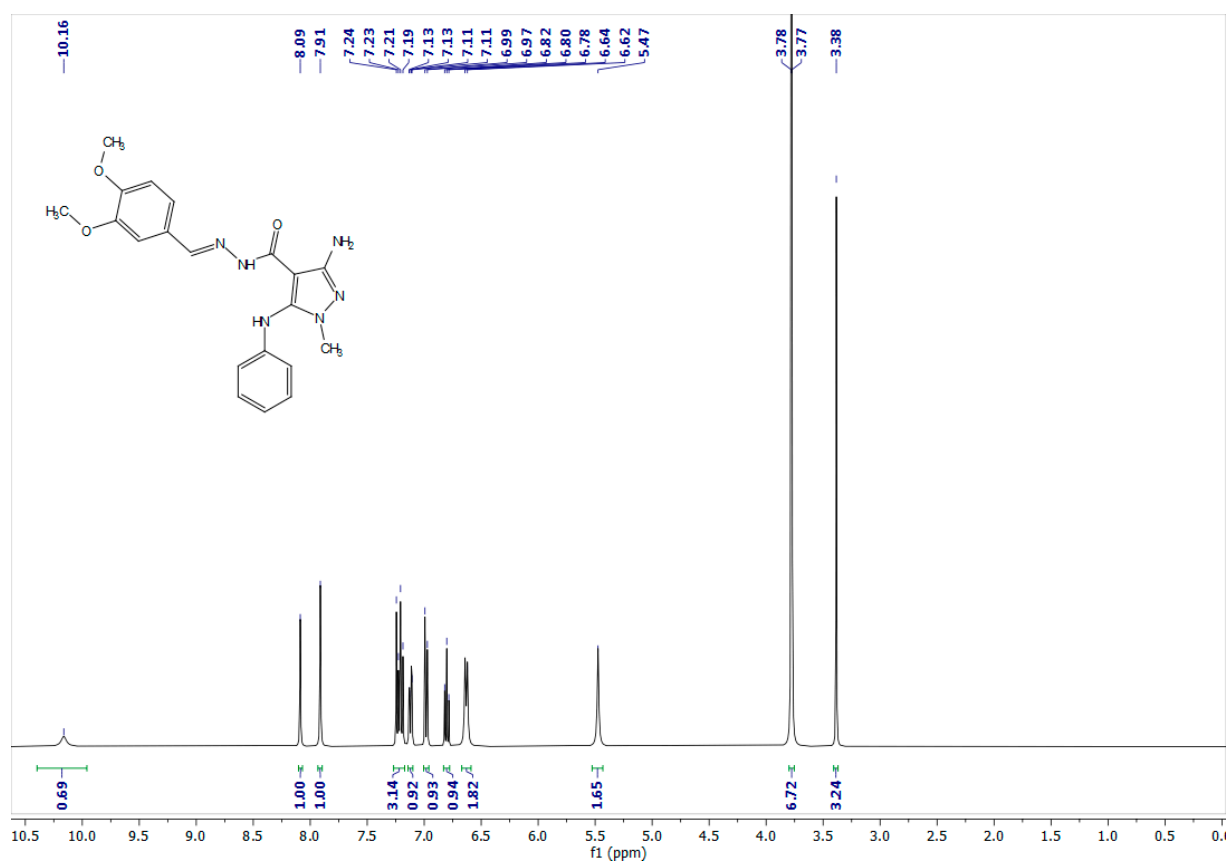

**Figure S8.**  $^{13}\text{C}$ -NMR (101 MHz,  $\text{d}_6$ -DMSO) spectrum of compound **11b**

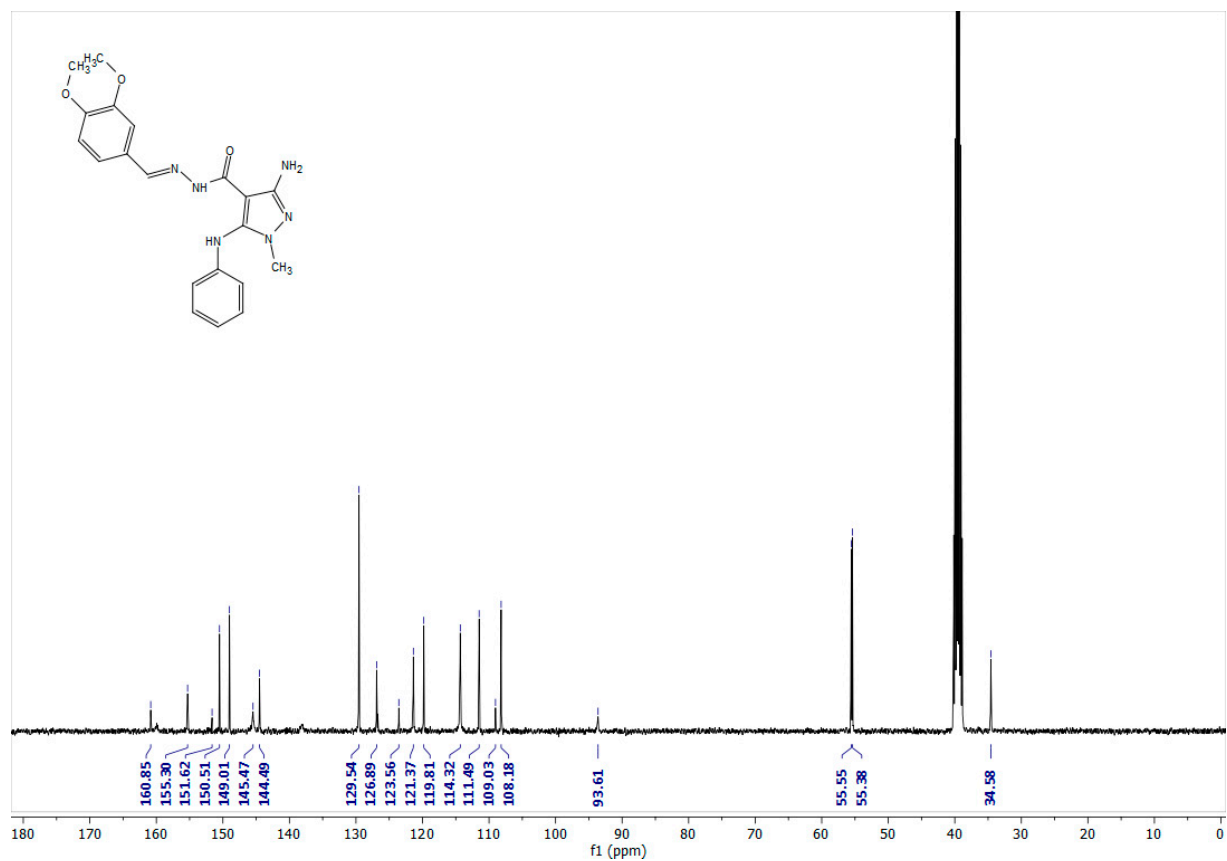

**Figure S9.**  $^1\text{H}$ -NMR (400 MHz,  $\text{d}_6$ -DMSO) spectrum of compound **11c**

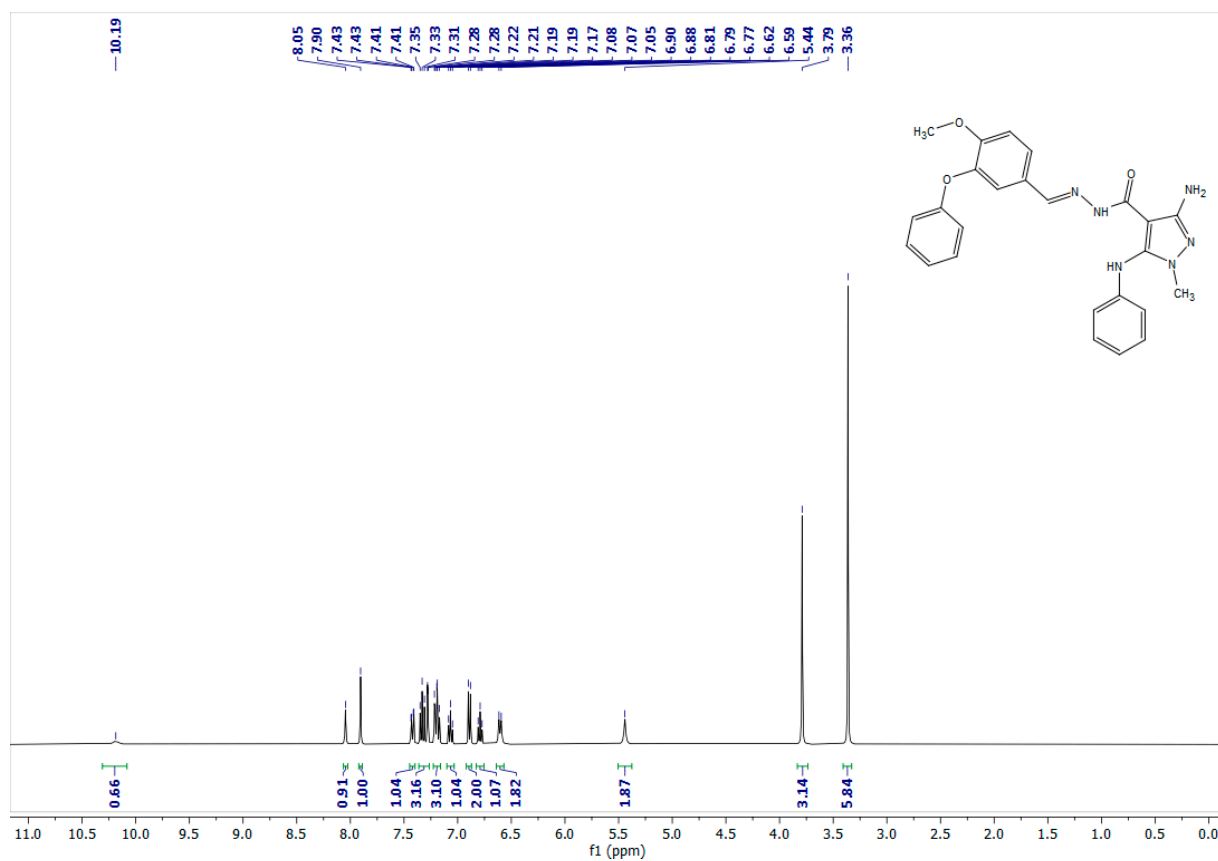

**Figure S10.**  $^{13}\text{C}$ -NMR (101 MHz,  $\text{d}_6$ -DMSO) spectrum of compound **11c**

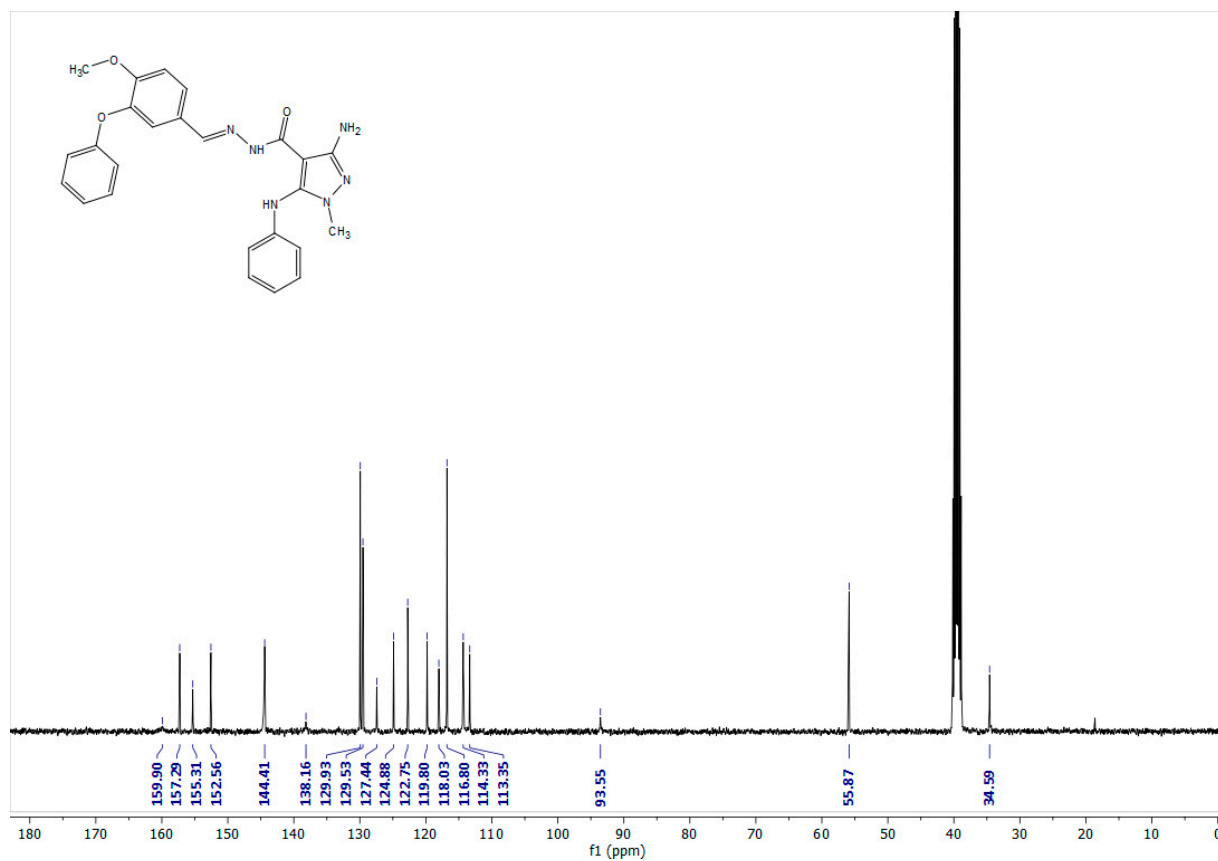

**Figure S11.**  $^1\text{H}$ -NMR (400 MHz,  $\text{d}_6$ -DMSO) spectrum of compound **11d**

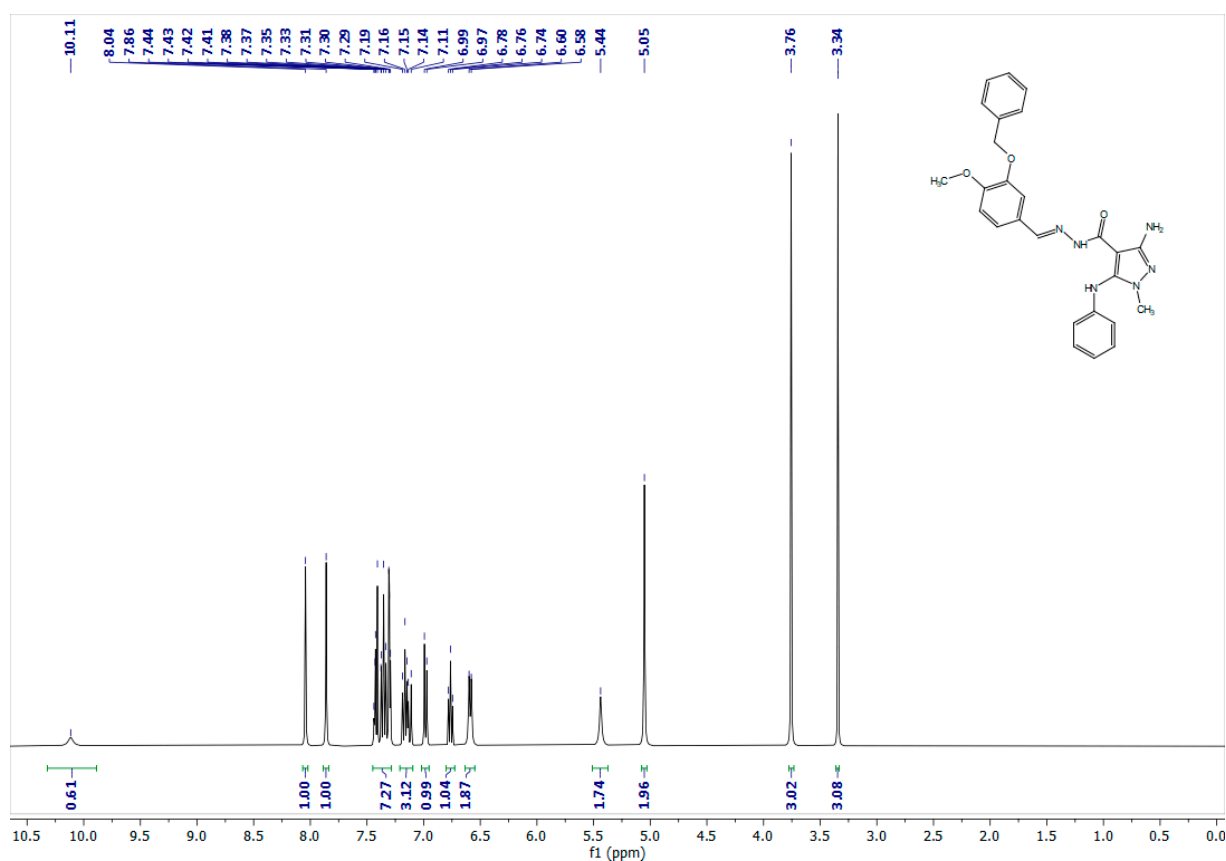

**Figure S12.**  $^{13}\text{C}$ -NMR (101 MHz,  $\text{d}_6$ -DMSO) spectrum of compound **11d**

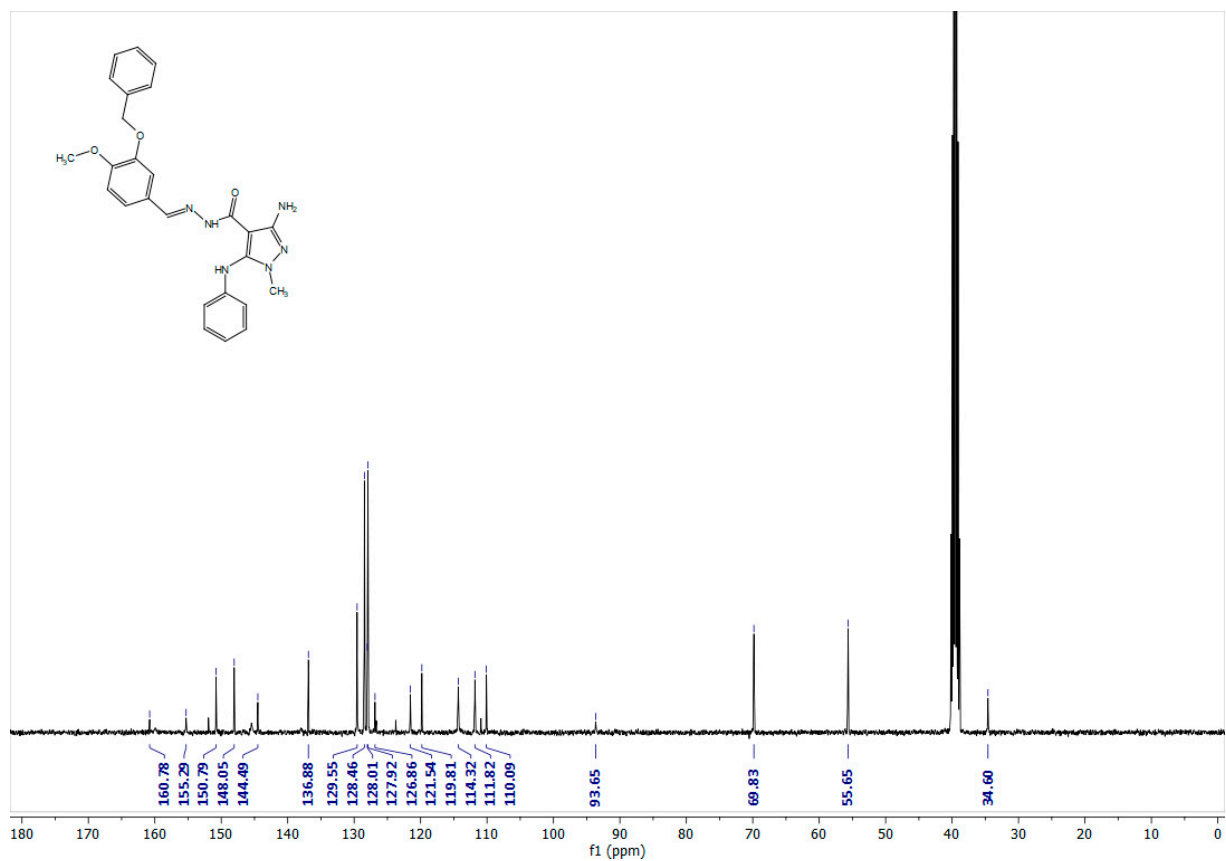

**Figure S13.**  $^1\text{H}$ -NMR (400 MHz,  $\text{d}_6$ -DMSO) spectrum of compound **12a**

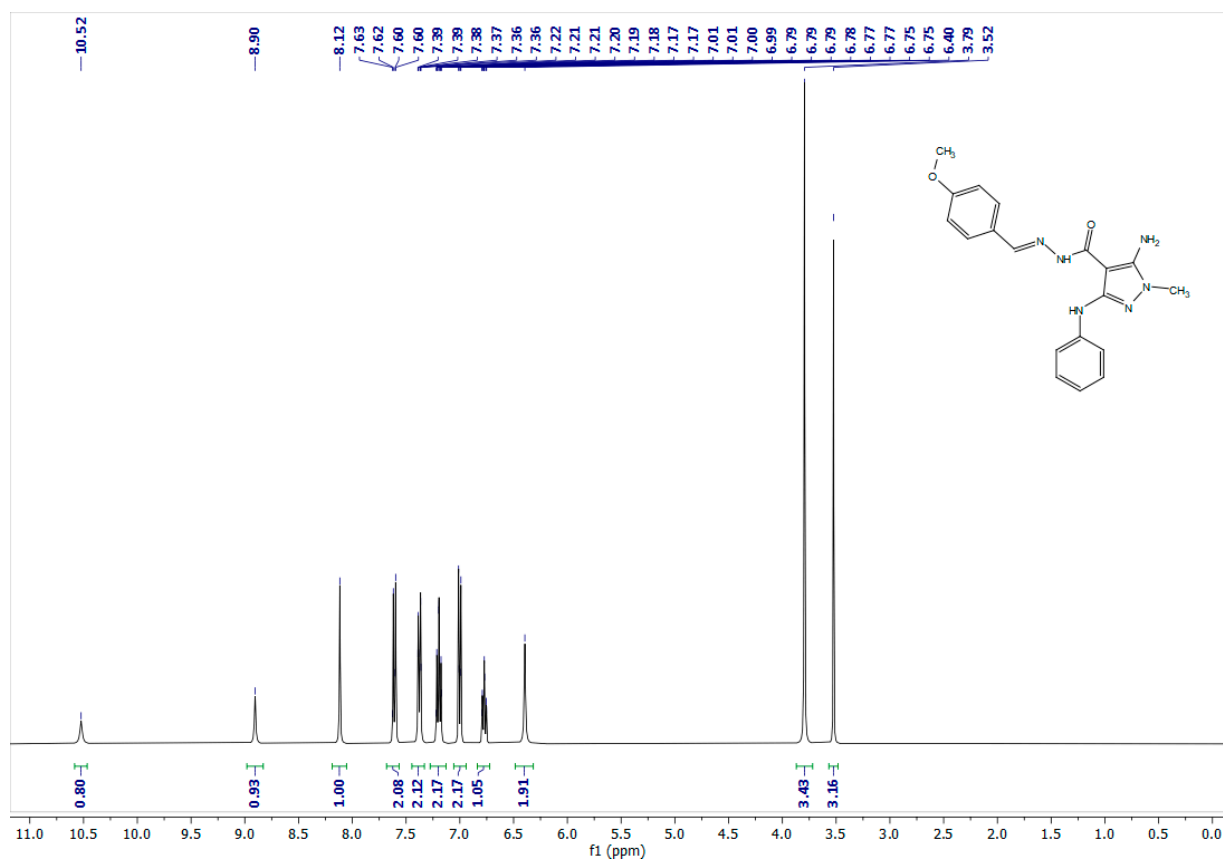

**Figure S14.**  $^{13}\text{C}$ -NMR (101 MHz,  $\text{d}_6$ -DMSO) spectrum of compound **12a**

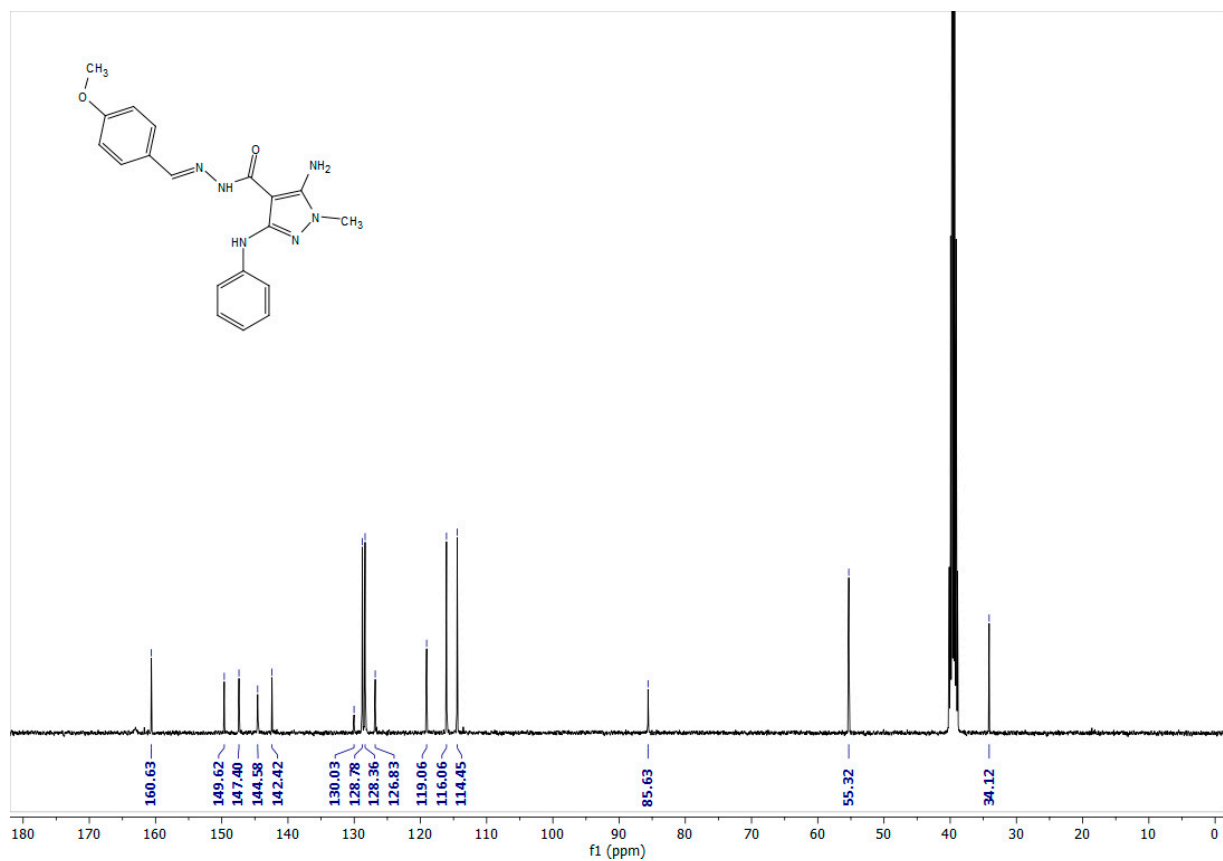

**Figure S15.**  $^1\text{H}$ -NMR (400 MHz,  $\text{d}_6$ -DMSO) spectrum of compound **12b**

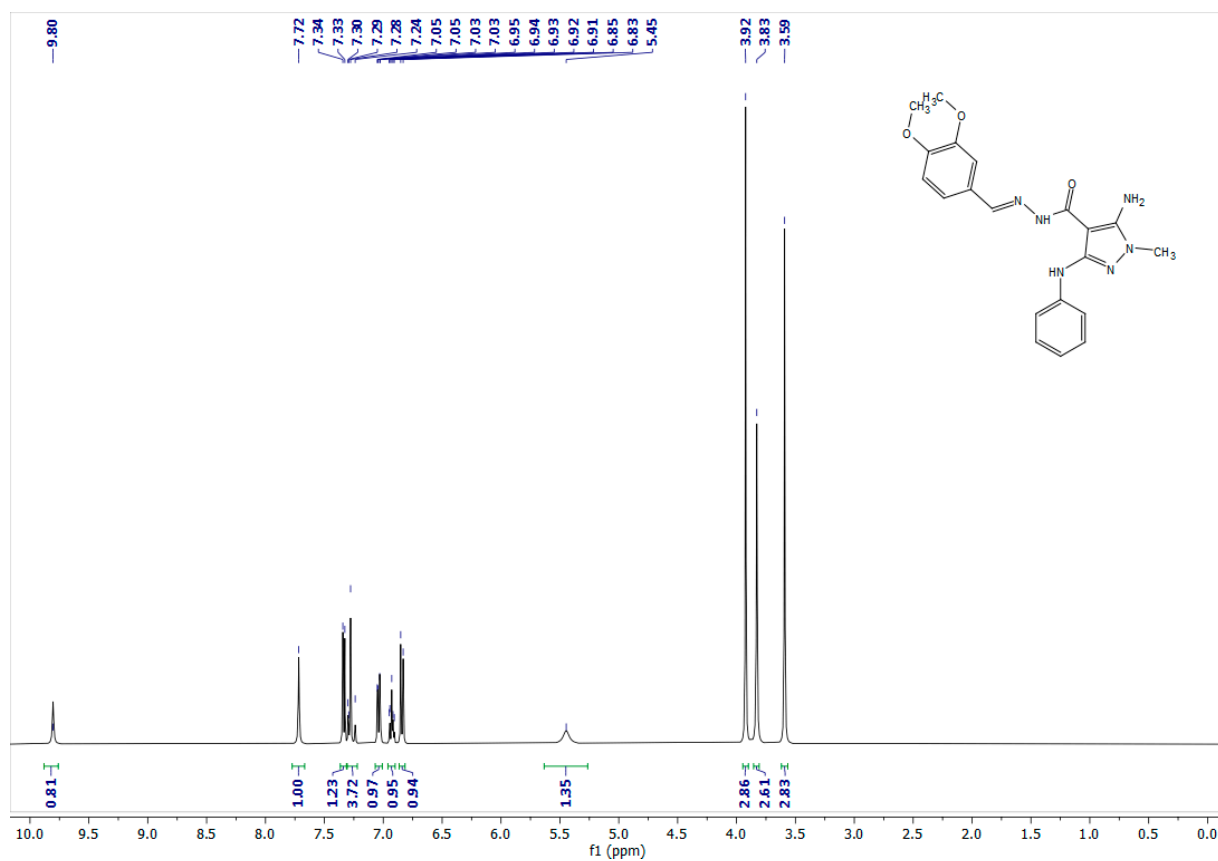

**Figure S16.**  $^{13}\text{C}$ -NMR (101 MHz,  $\text{d}_6$ -DMSO) spectrum of compound **12b**

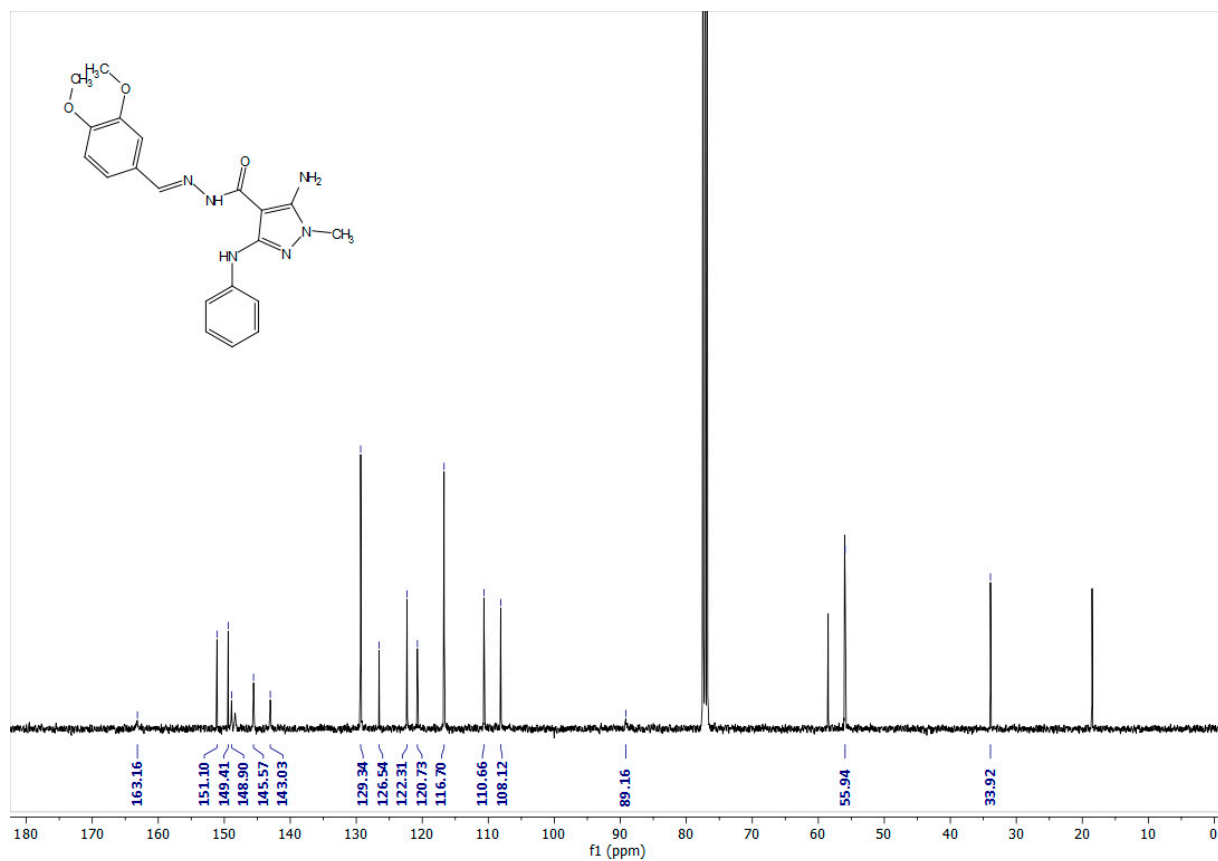

**Figure S17.**  $^1\text{H}$ -NMR (400 MHz,  $\text{d}_6$ -DMSO) spectrum of compound **12c**

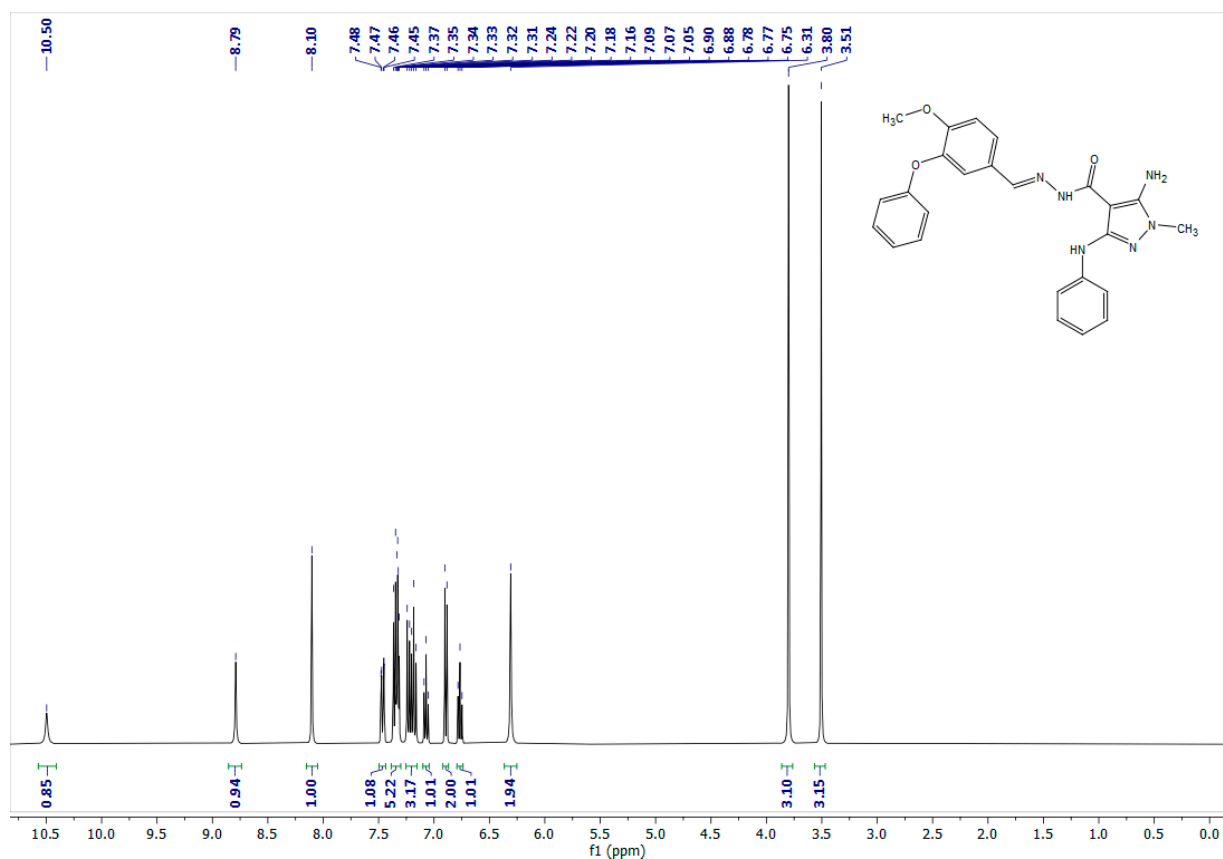

**Figure S18.**  $^{13}\text{C}$ -NMR (101 MHz,  $\text{d}_6$ -DMSO) spectrum of compound **12c**

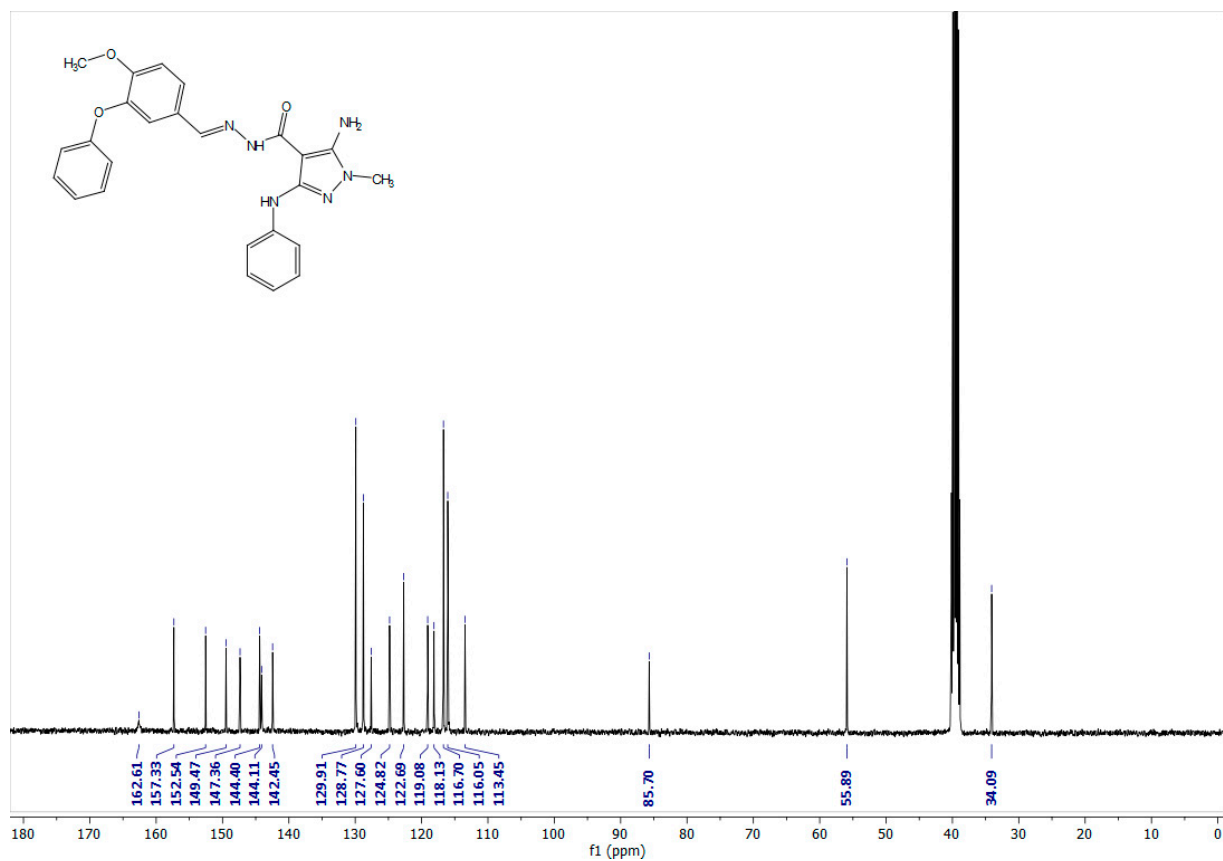

**Figure S19.**  $^1\text{H}$ -NMR (400 MHz,  $\text{d}_6$ -DMSO) spectrum of compound **12d**

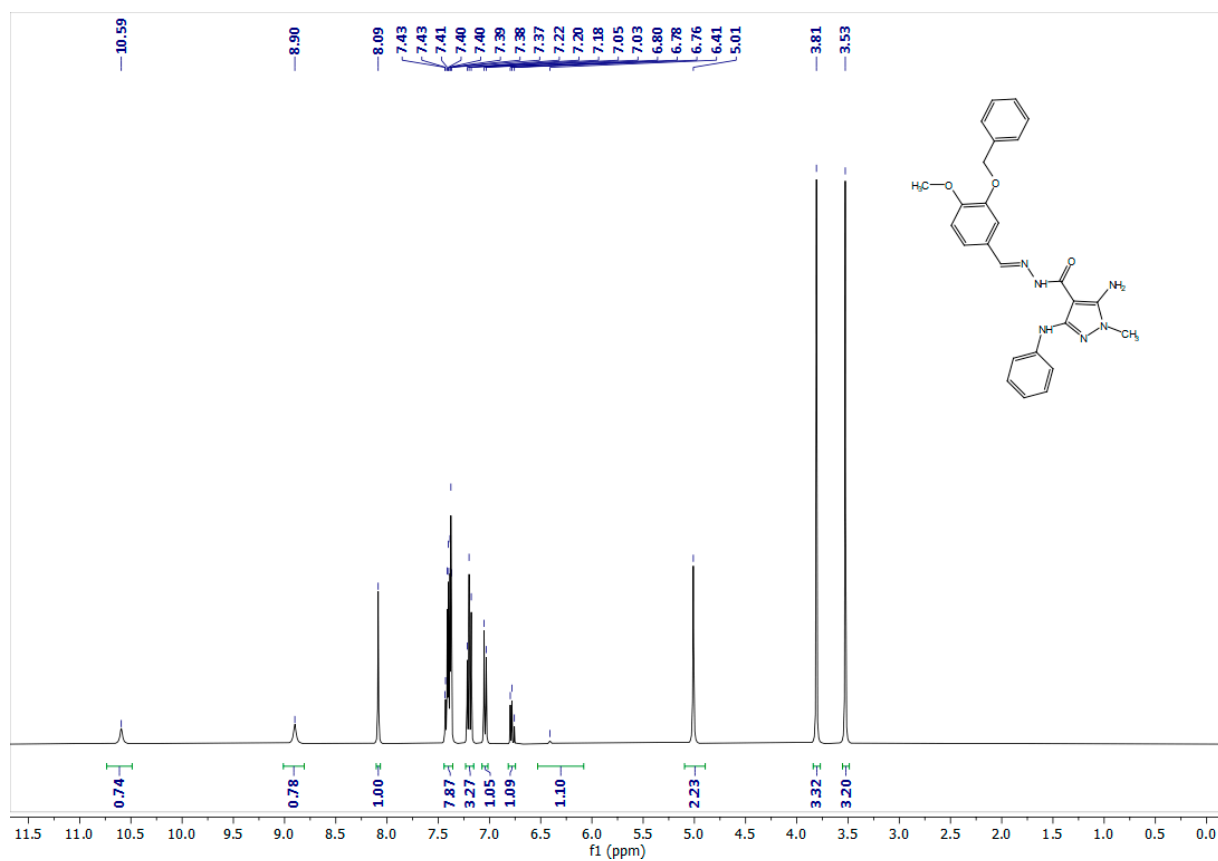

**Figure S20.**  $^{13}\text{C}$ -NMR (101 MHz,  $\text{d}_6$ -DMSO) spectrum of compound **12d**

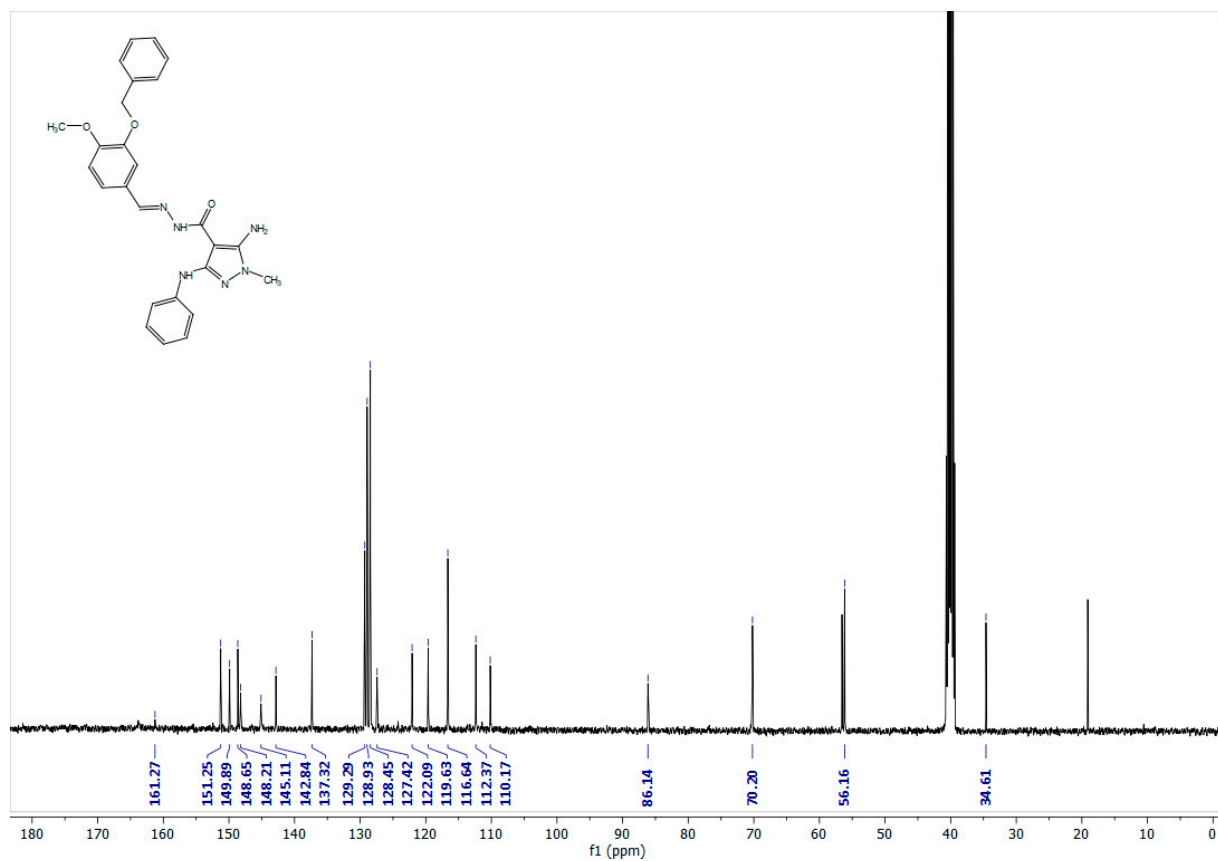

**Figure S21.**  $^1\text{H}$ -NMR (400 MHz,  $\text{d}_6$ -DMSO) spectrum of compound **13a**

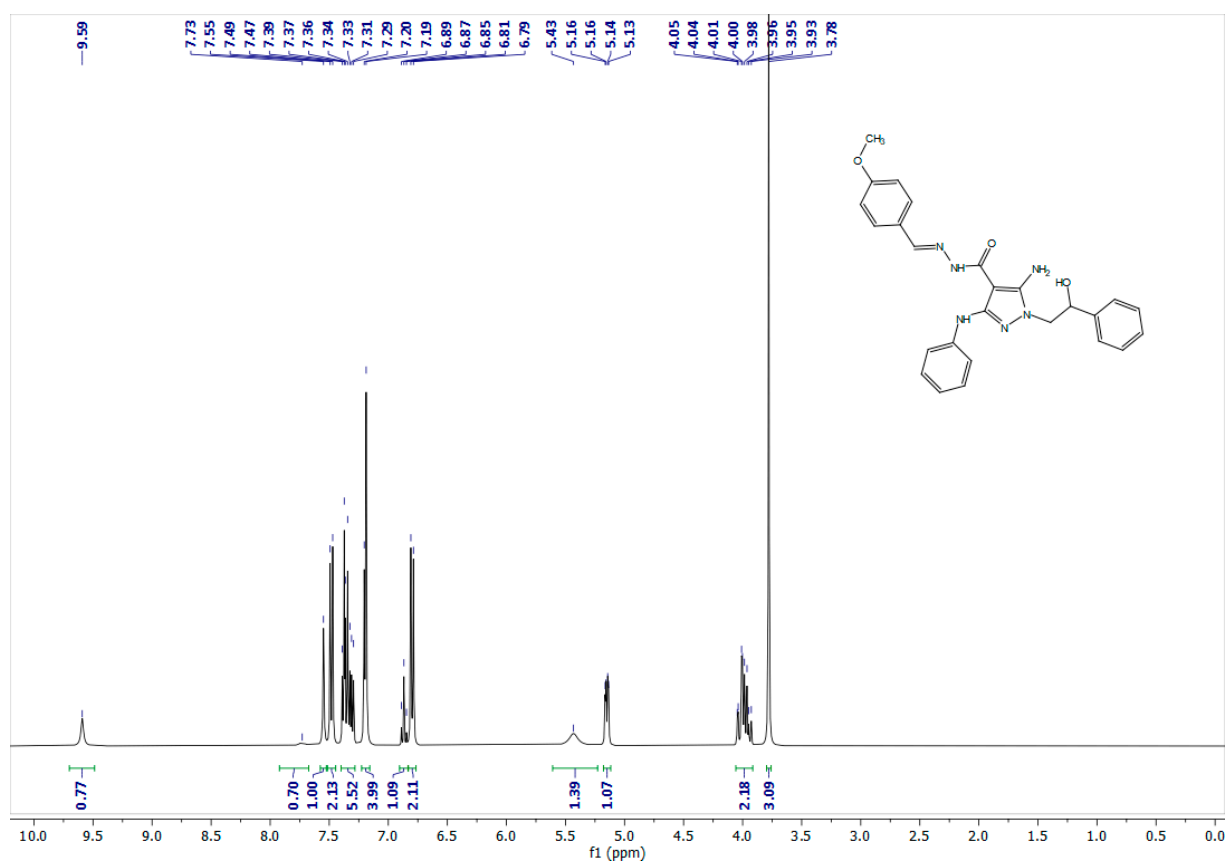

**Figure S22.**  $^{13}\text{C}$ -NMR (101 MHz,  $\text{d}_6$ -DMSO) spectrum of compound **13a**

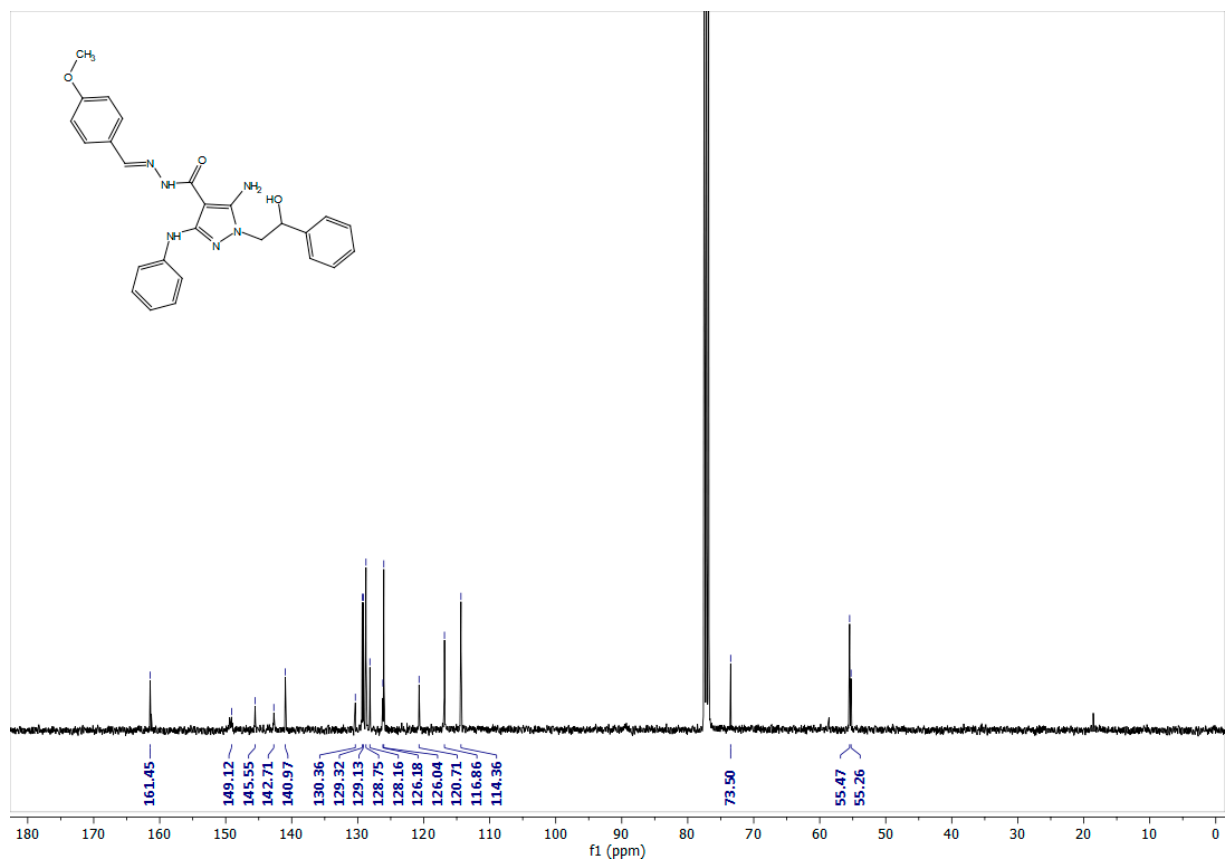

**Figure S23.**  $^1\text{H}$ -NMR (400 MHz,  $\text{d}_6$ -DMSO) spectrum of compound **13b**

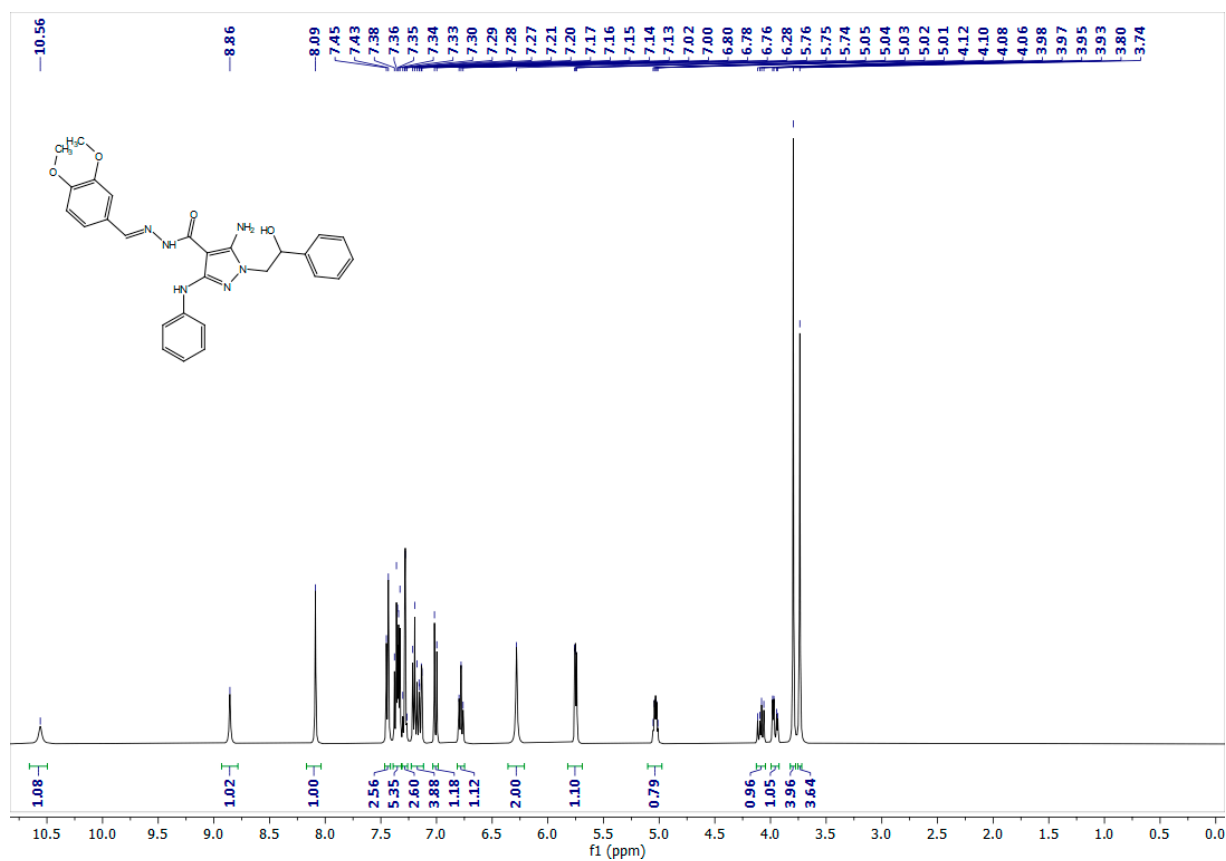

**Figure S24.**  $^{13}\text{C}$ -NMR (101 MHz,  $\text{d}_6$ -DMSO) spectrum of compound **13b**

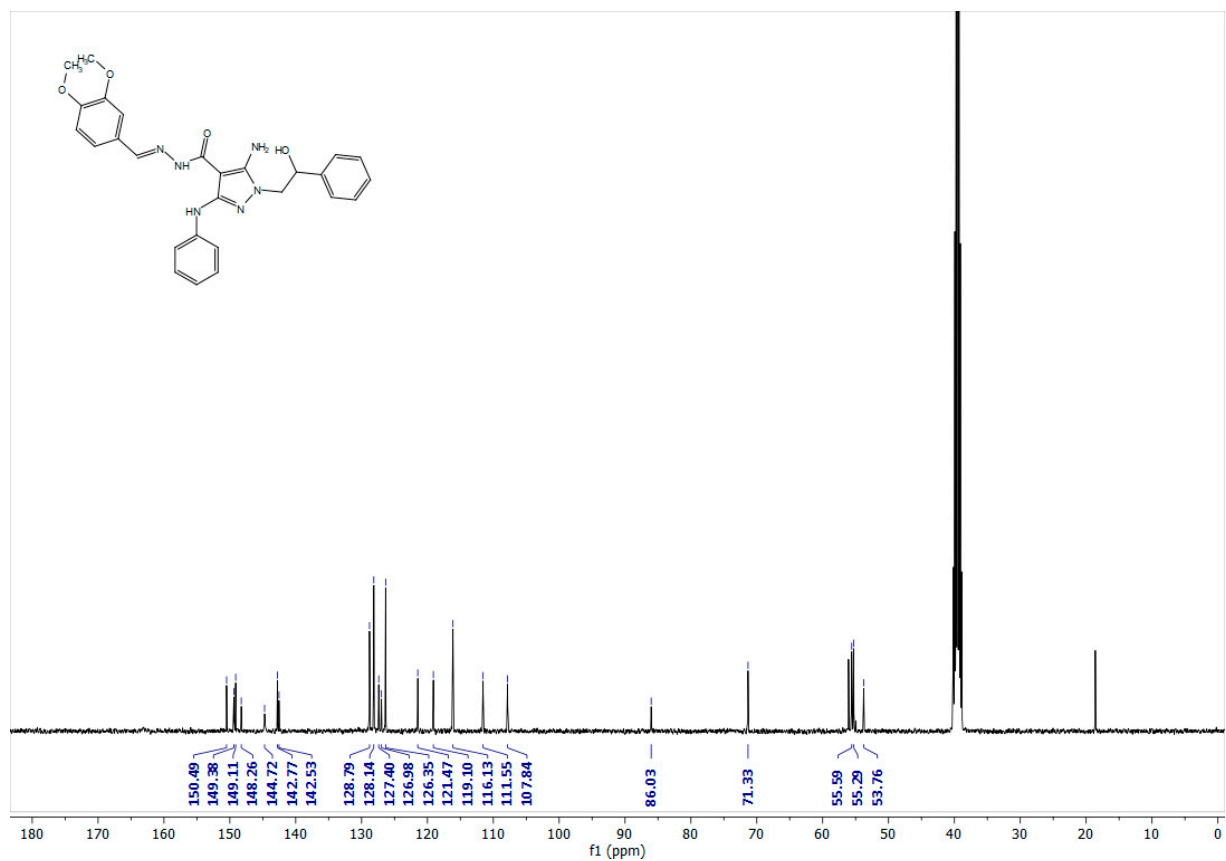

**Figure S25.**  $^1\text{H}$ -NMR (400 MHz,  $\text{d}_6$ -DMSO) spectrum of compound **13c**

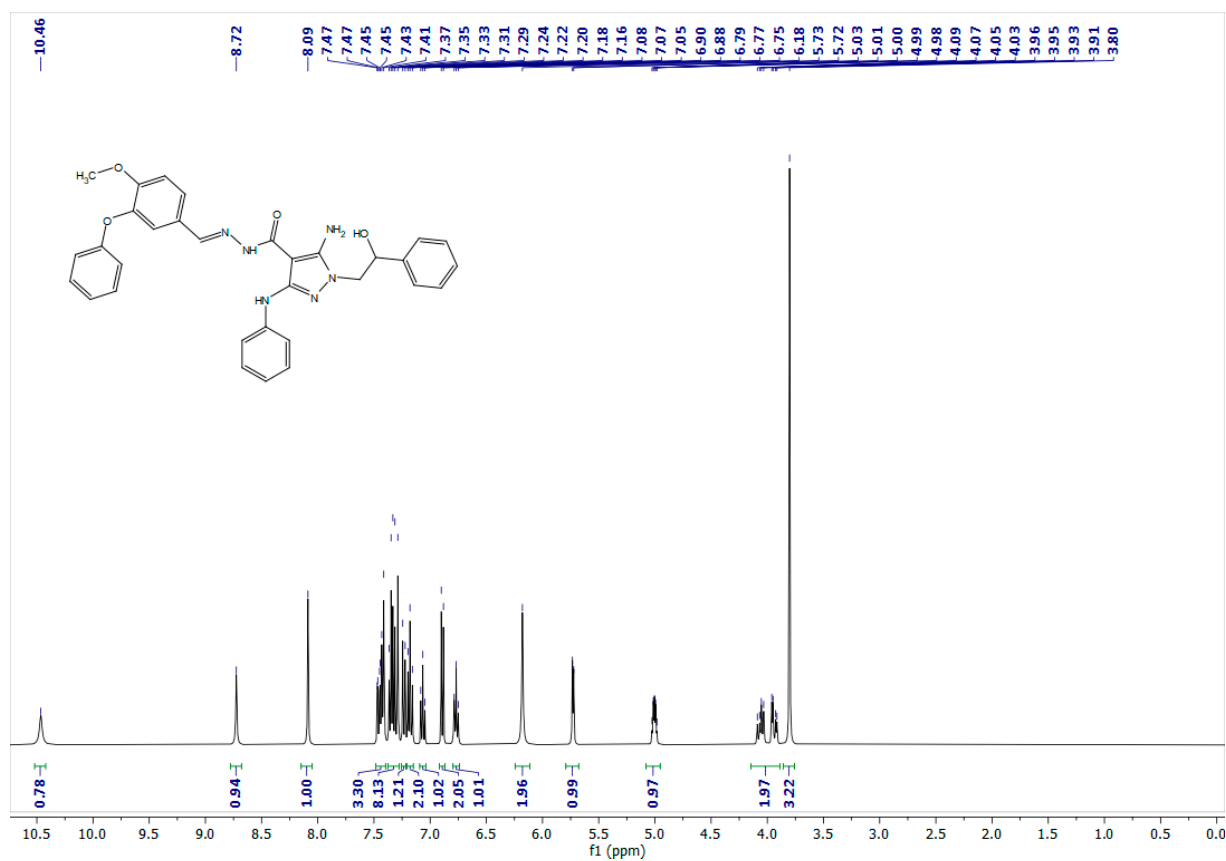

**Figure S26.**  $^{13}\text{C}$ -NMR (101 MHz,  $\text{d}_6$ -DMSO) spectrum of compound **13c**

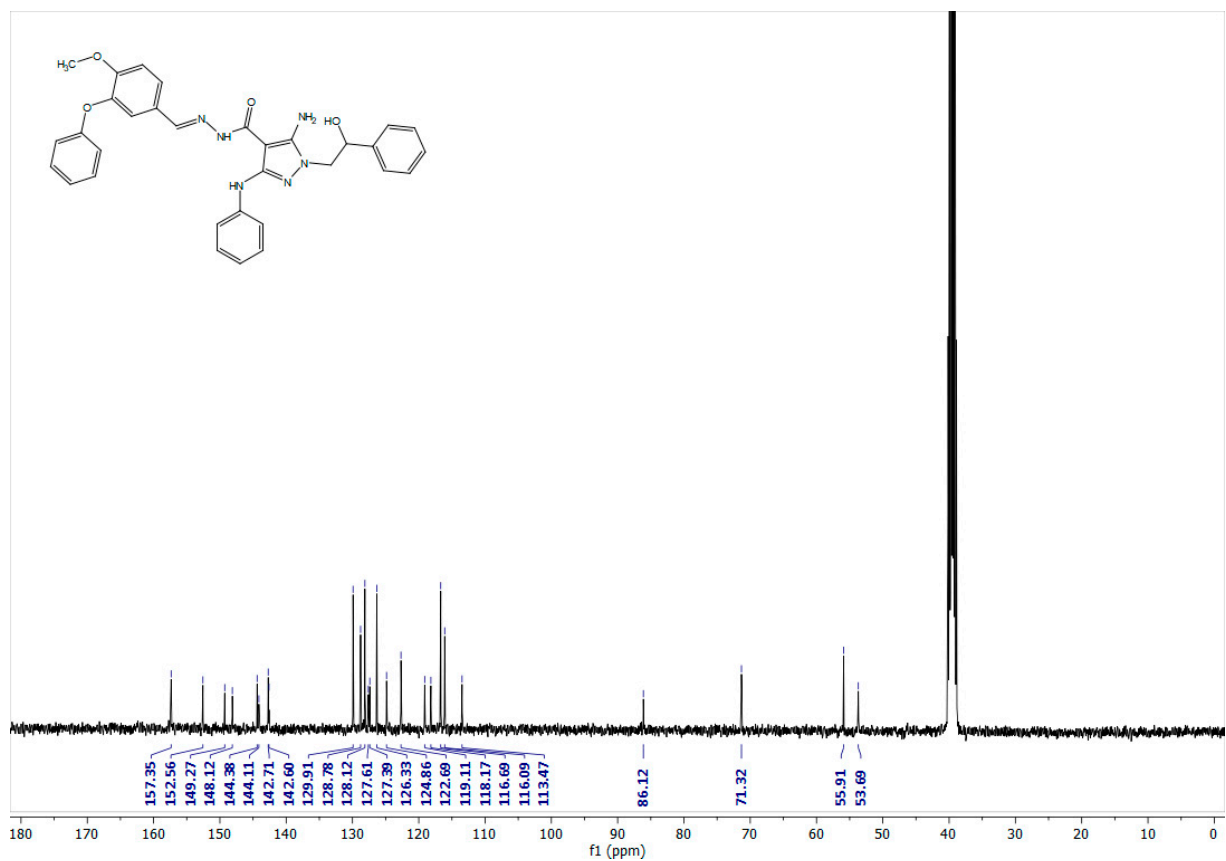

**Figure S27.**  $^1\text{H}$ -NMR (400 MHz,  $\text{d}_6$ -DMSO) spectrum of compound **13d**

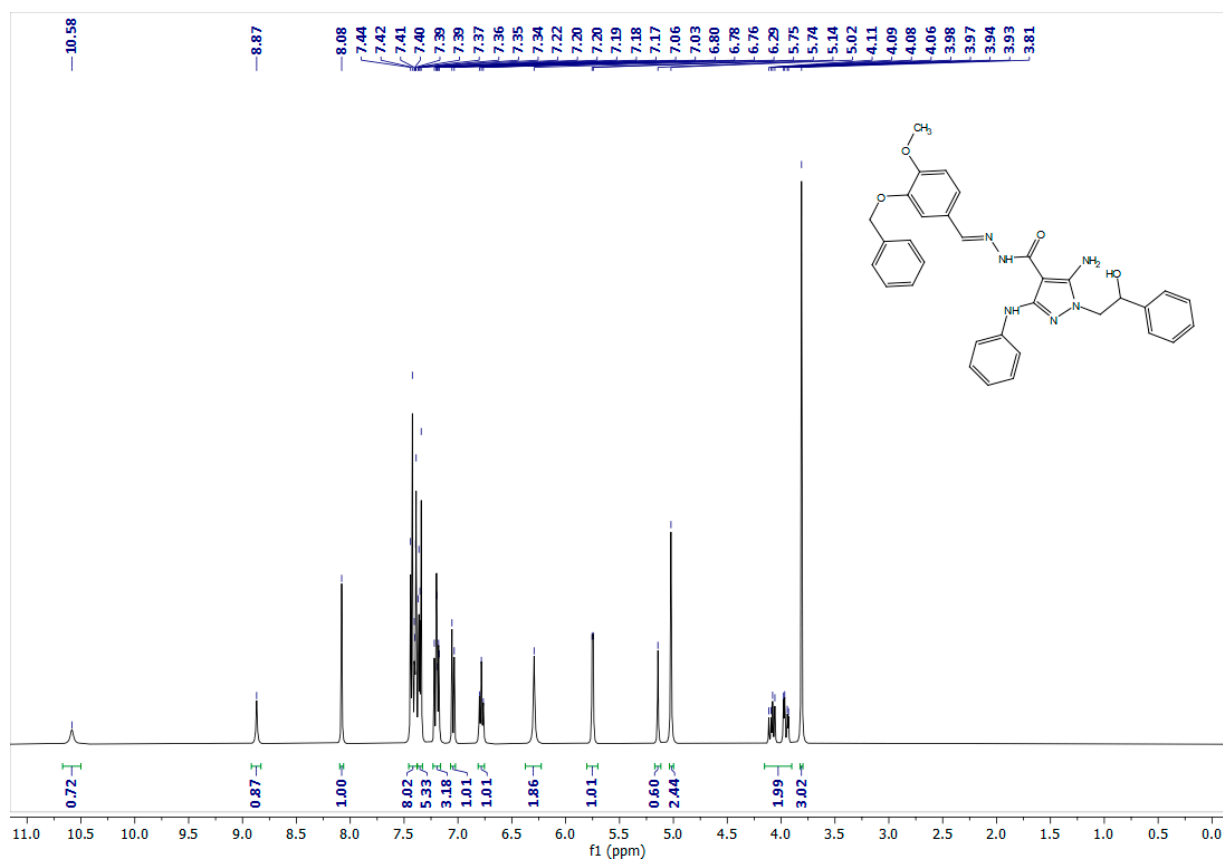

**Figure S28.**  $^{13}\text{C}$ -NMR (101 MHz,  $\text{d}_6$ -DMSO) spectrum of compound **13d**

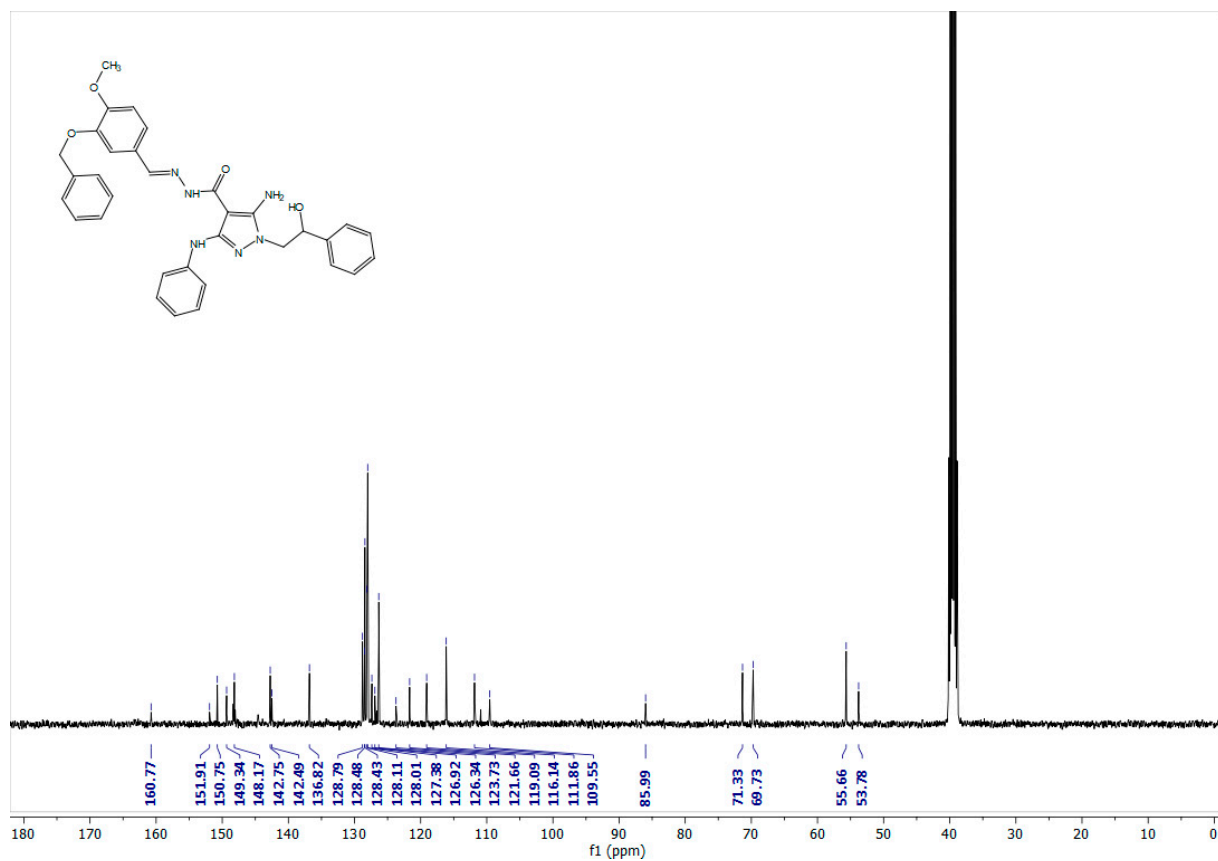

**Figure S29.**  $^1\text{H}$ -NMR (400 MHz,  $\text{d}_6$ -DMSO) spectrum of compound **14**

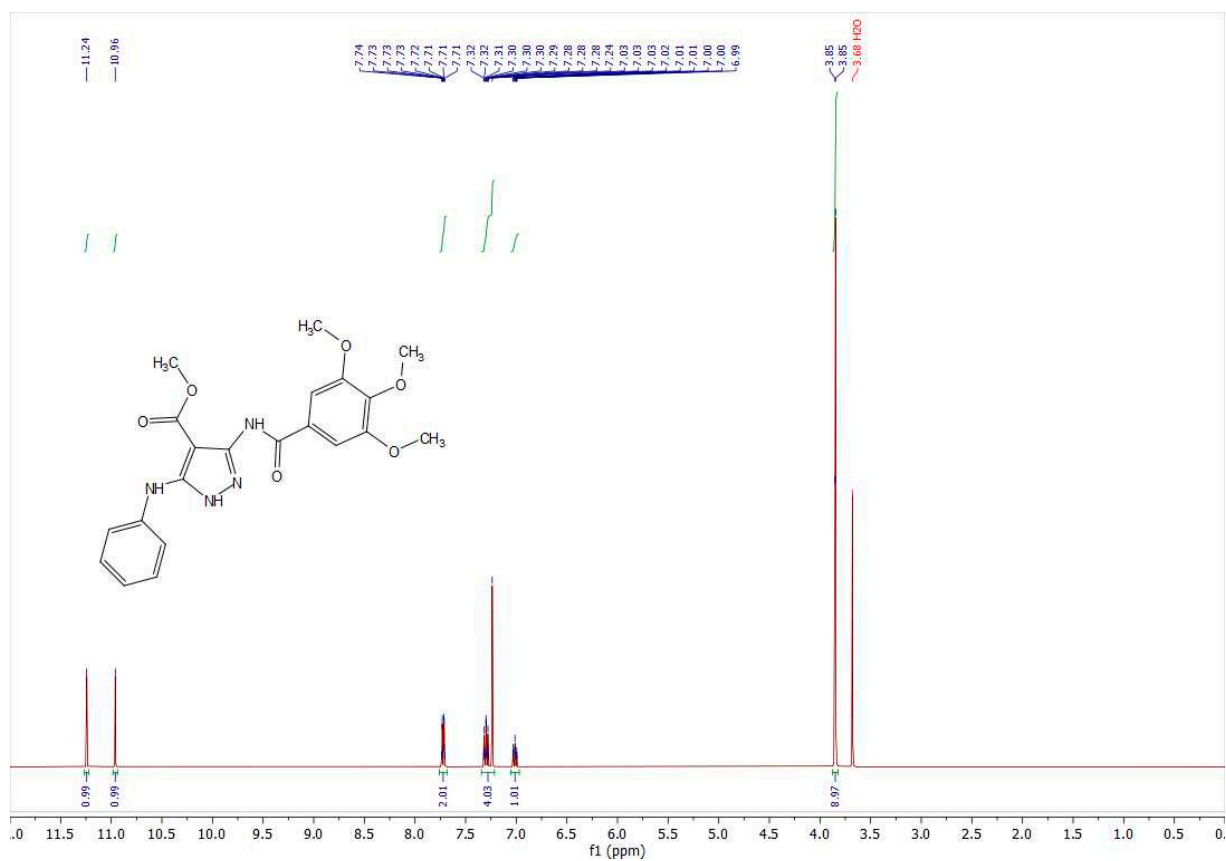

**Figure S30.**  $^1\text{H}$ -NMR (400 MHz,  $\text{d}_6$ -DMSO) spectrum of compound **15**

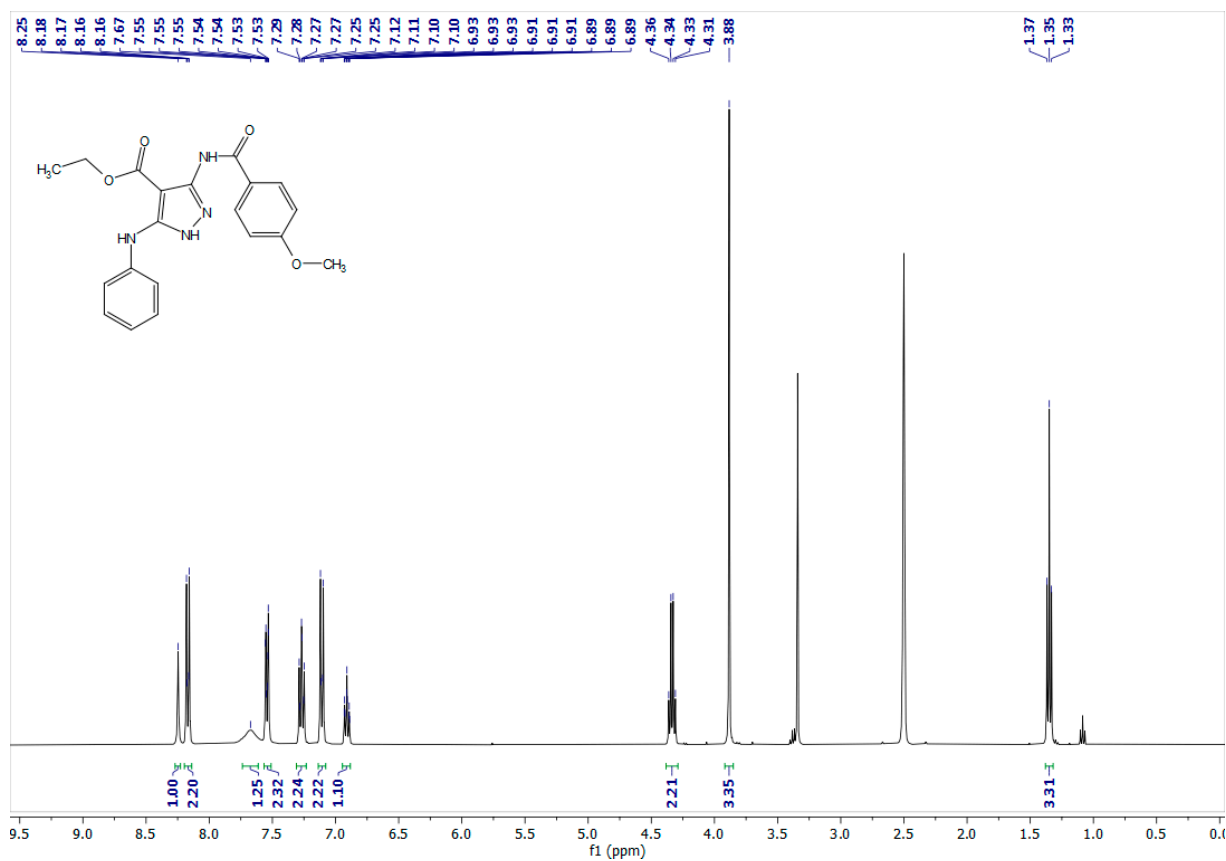

**Figure S31.**  $^{13}\text{C}$ -NMR (101 MHz,  $\text{d}_6$ -DMSO) spectrum of compound **15**

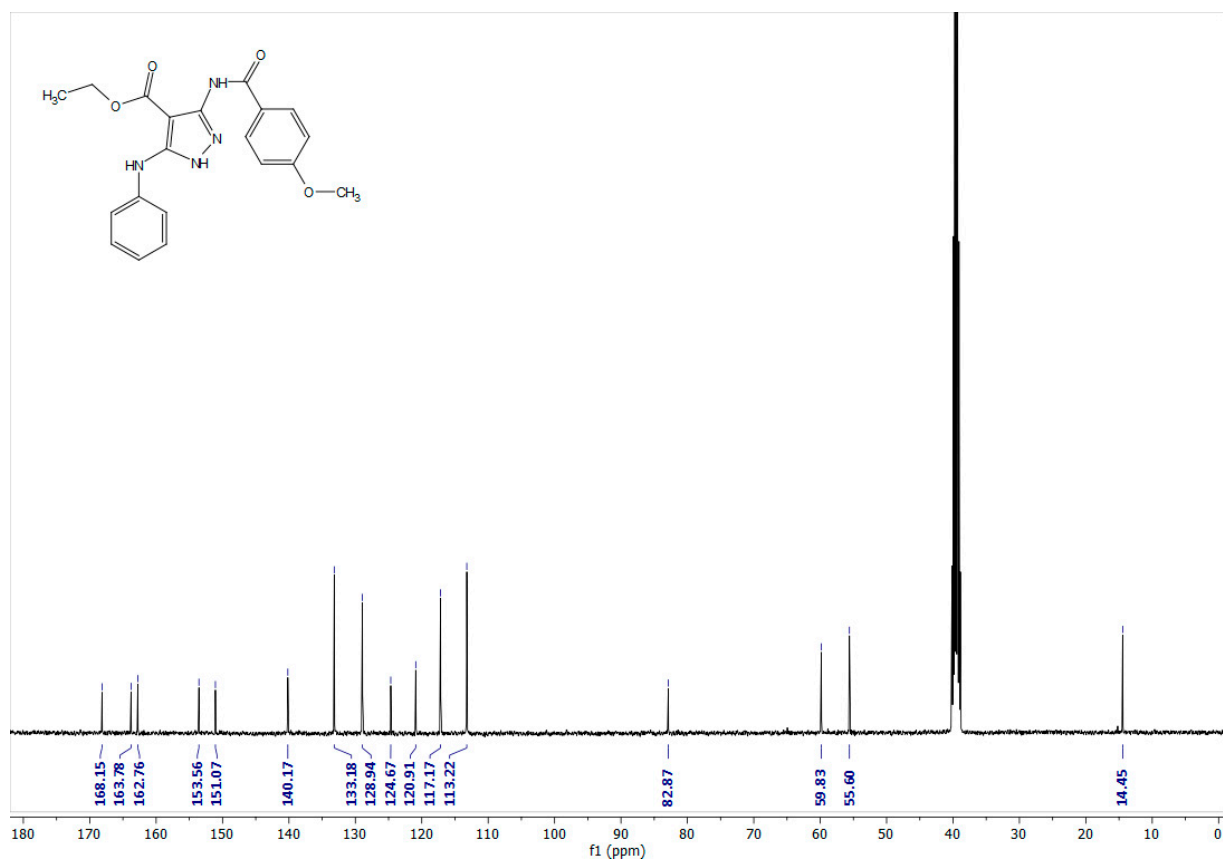

**Figure S32.**  $^1\text{H}$ -NMR (400 MHz,  $\text{d}_6$ -DMSO) spectrum of compound **16**

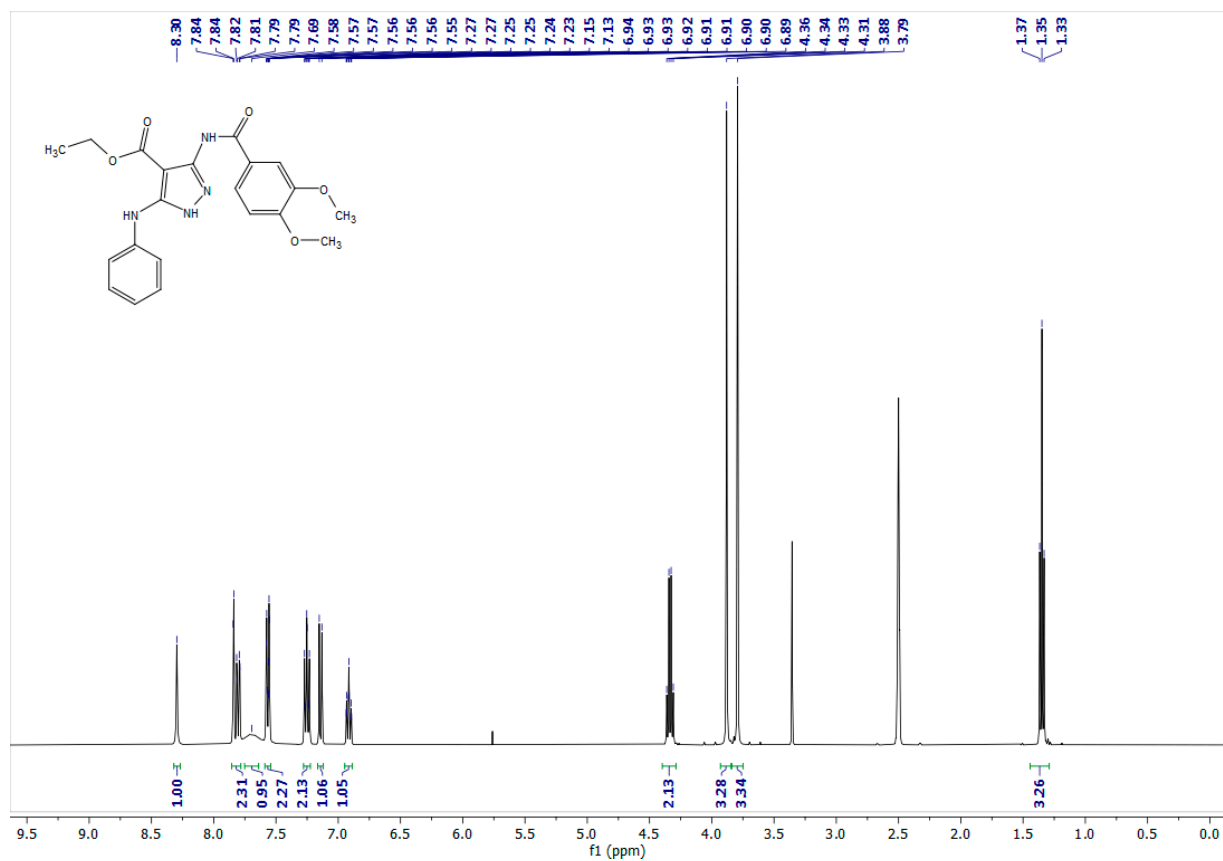

**Figure S33.**  $^{13}\text{C}$ -NMR (101 MHz,  $\text{d}_6$ -DMSO) spectrum of compound **16**

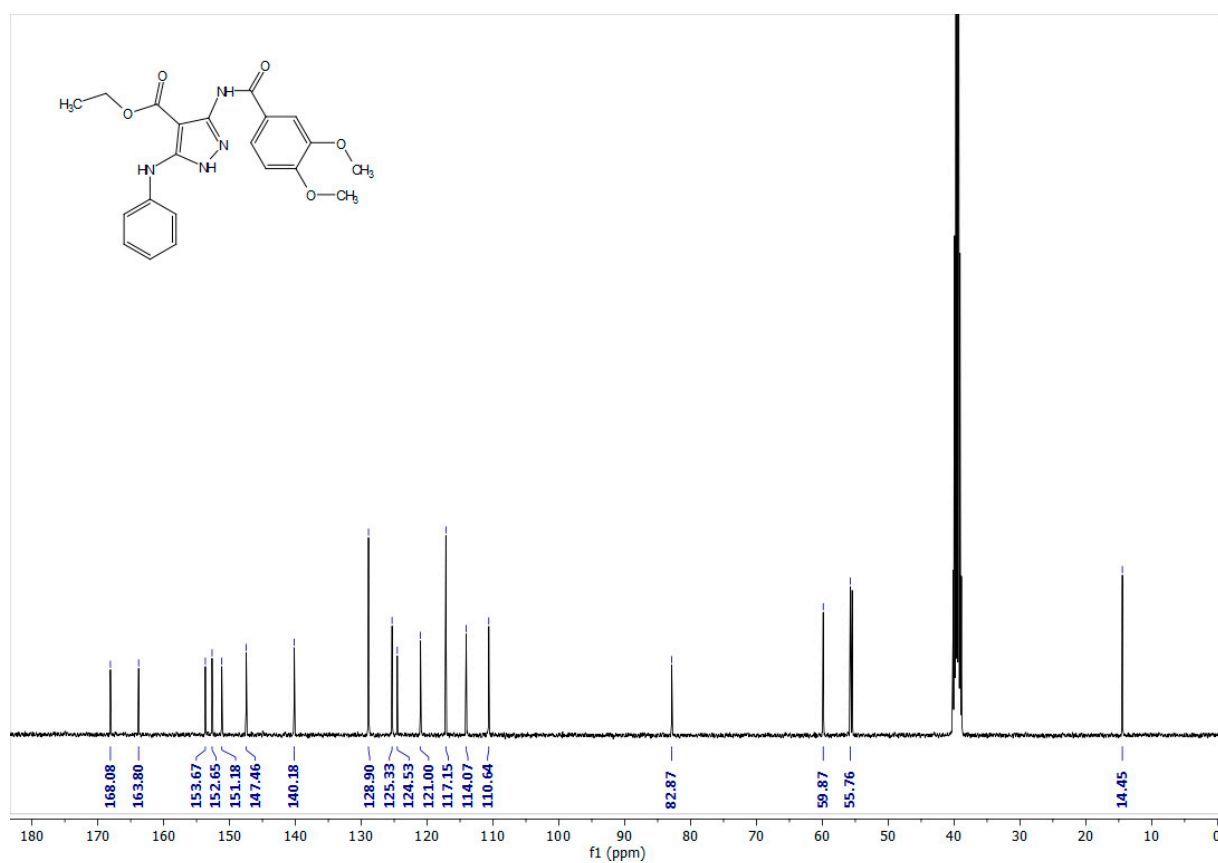

**Figure S34.**  $^1\text{H}$ -NMR (400 MHz,  $\text{d}_6$ -DMSO) spectrum of compound **17**

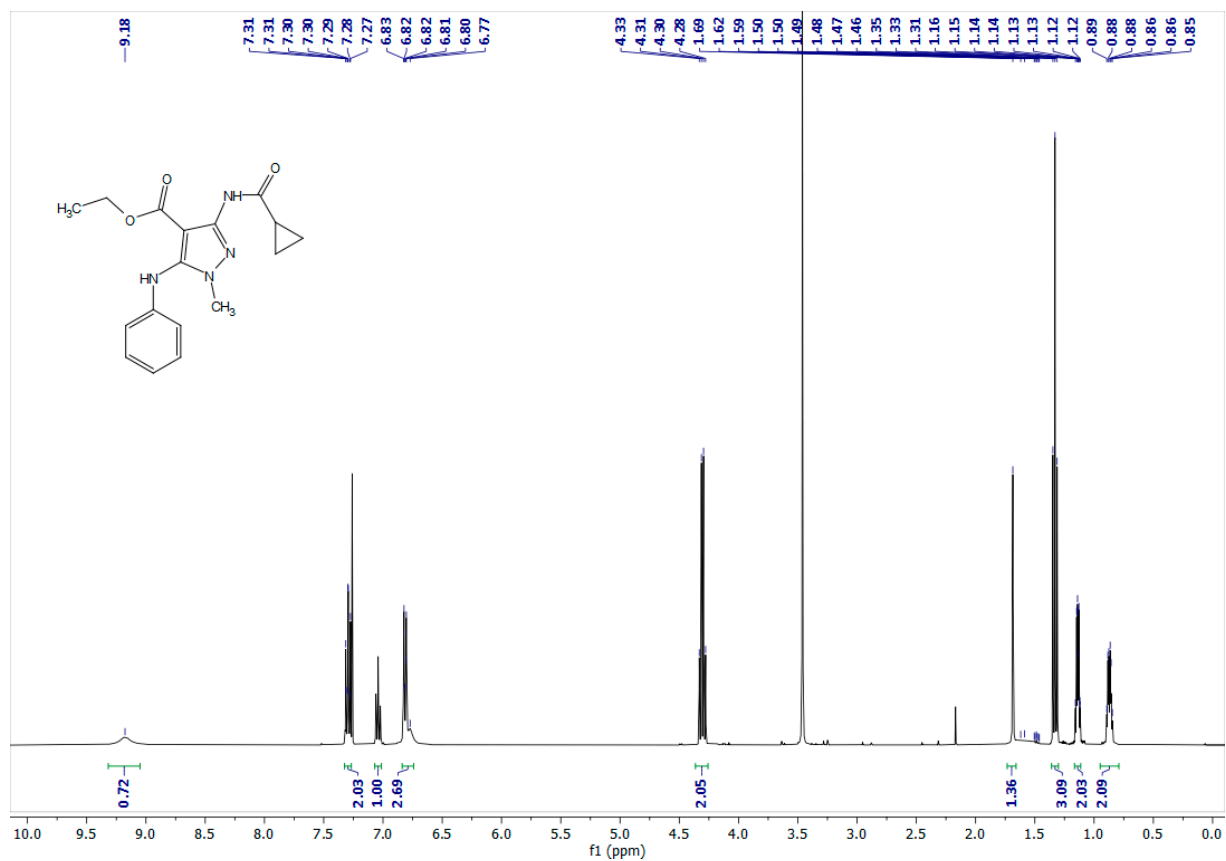

**Figure S35.**  $^1\text{H}$ -NMR (400 MHz,  $\text{d}_6$ -DMSO) spectrum of compound **18**

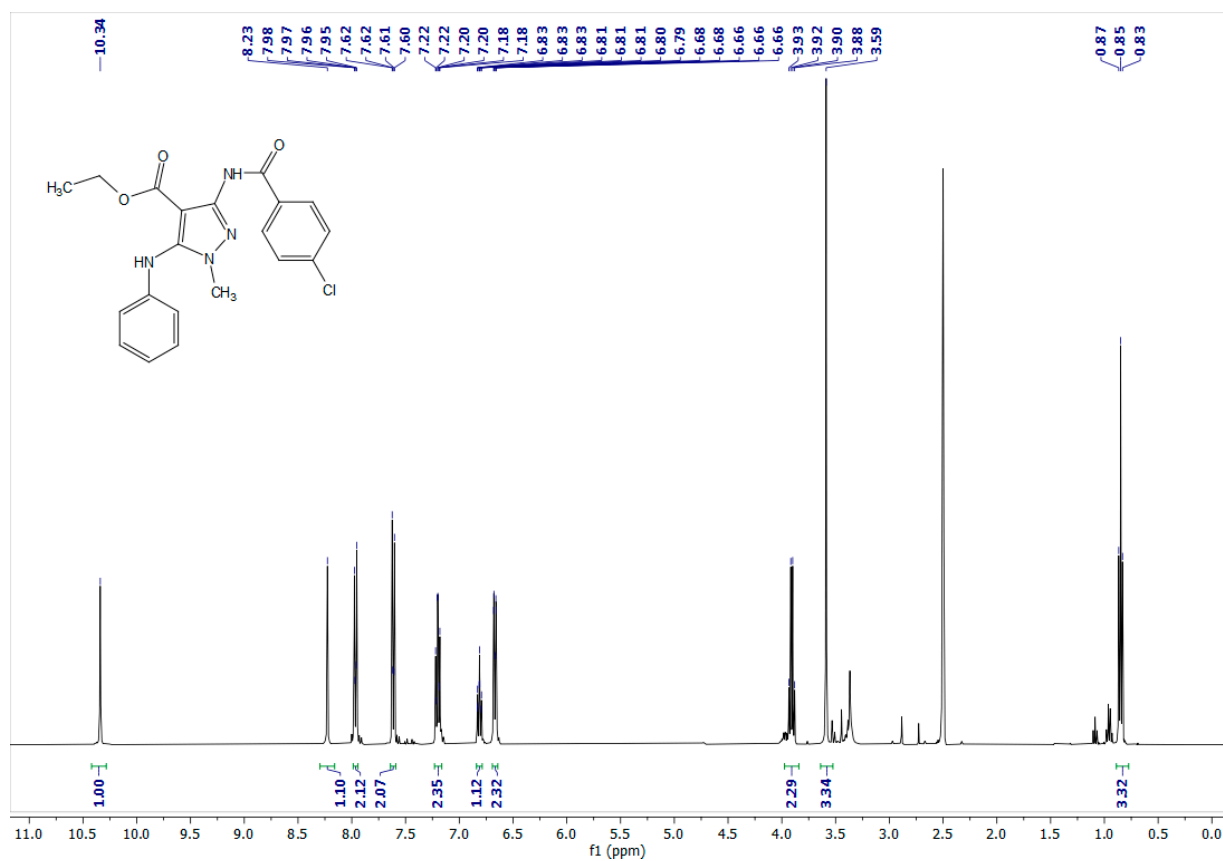

**Figure S36.**  $^{13}\text{C}$ -NMR (101 MHz,  $\text{d}_6$ -DMSO) spectrum of compound **18**

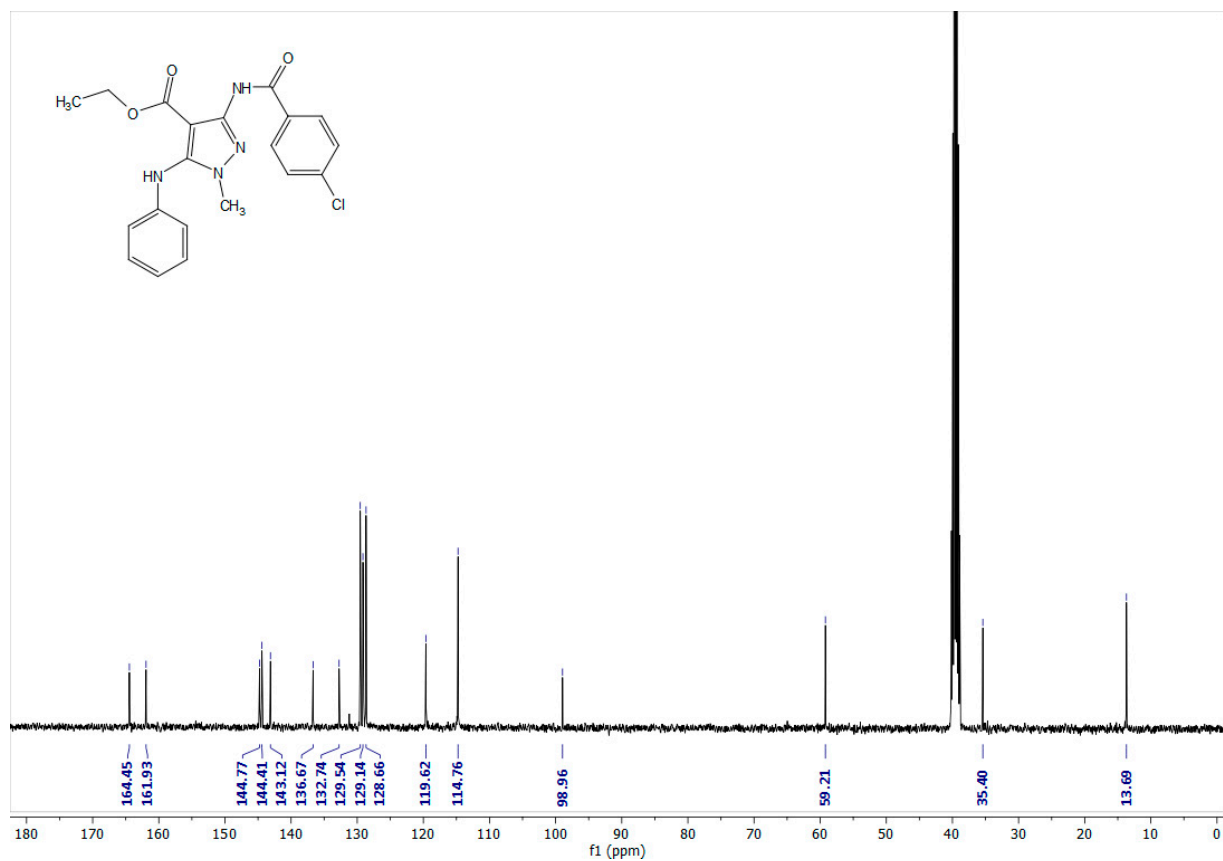

**Figure S37.**  $^1\text{H}$ -NMR (400 MHz,  $\text{d}_6$ -DMSO) spectrum of compound **19**

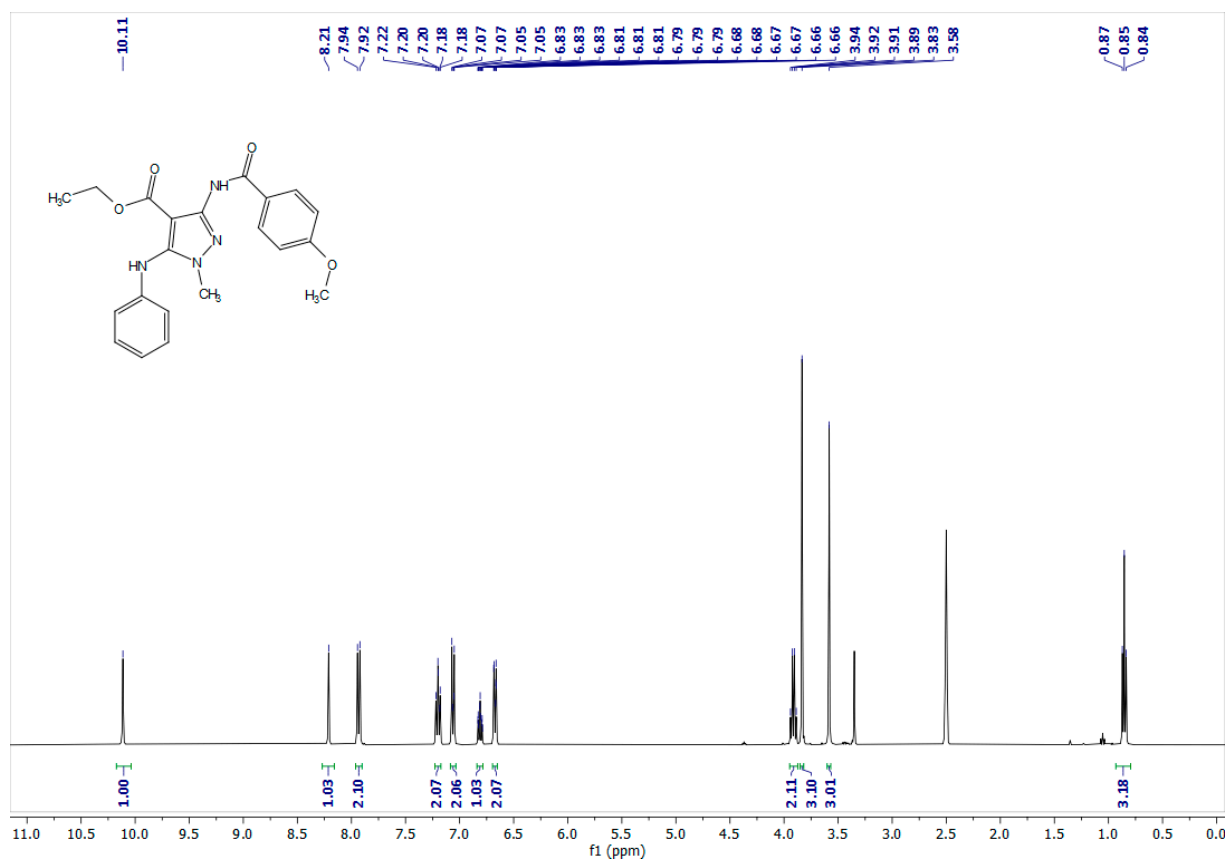

**Figure S38.**  $^{13}\text{C}$ -NMR (101 MHz,  $\text{d}_6$ -DMSO) spectrum of compound **19**

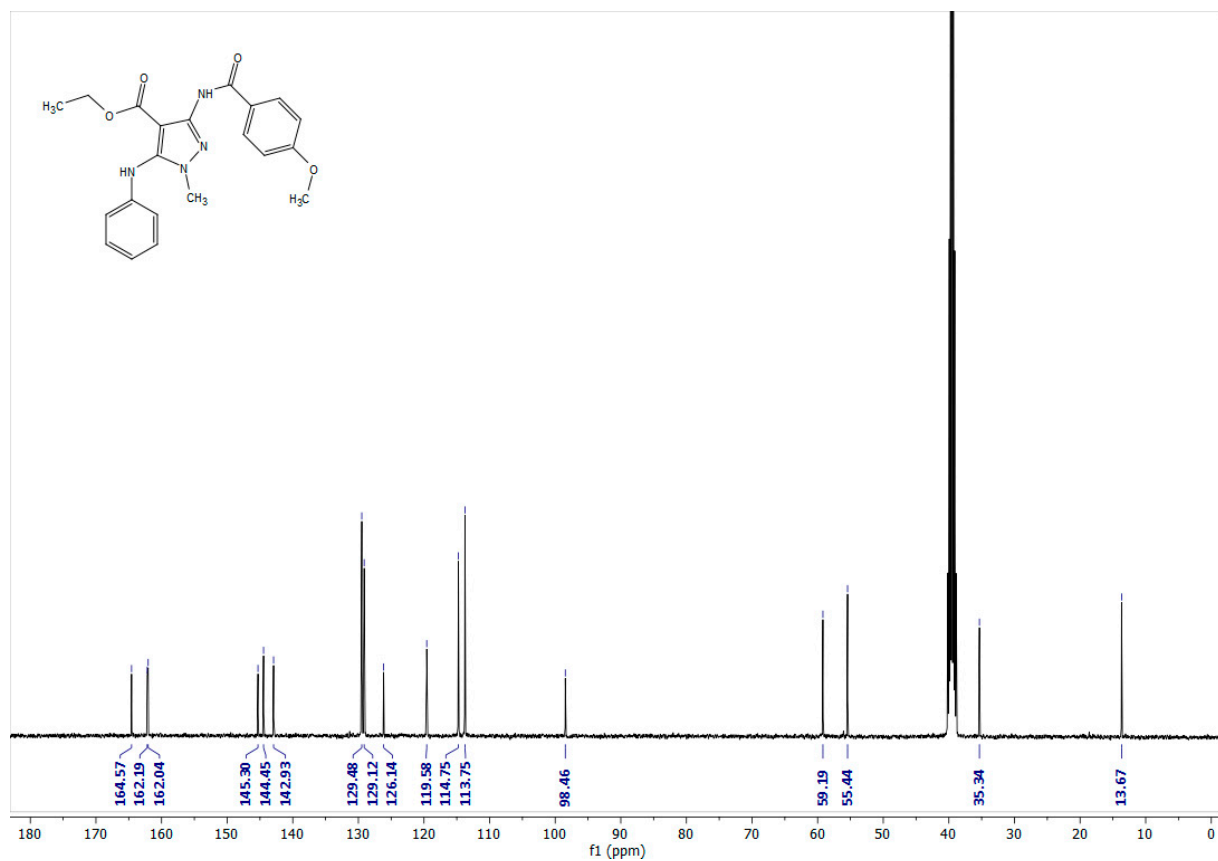

**Figure S39.**  $^1\text{H}$ -NMR (400 MHz,  $d_6$ -DMSO) spectrum of compound **20**

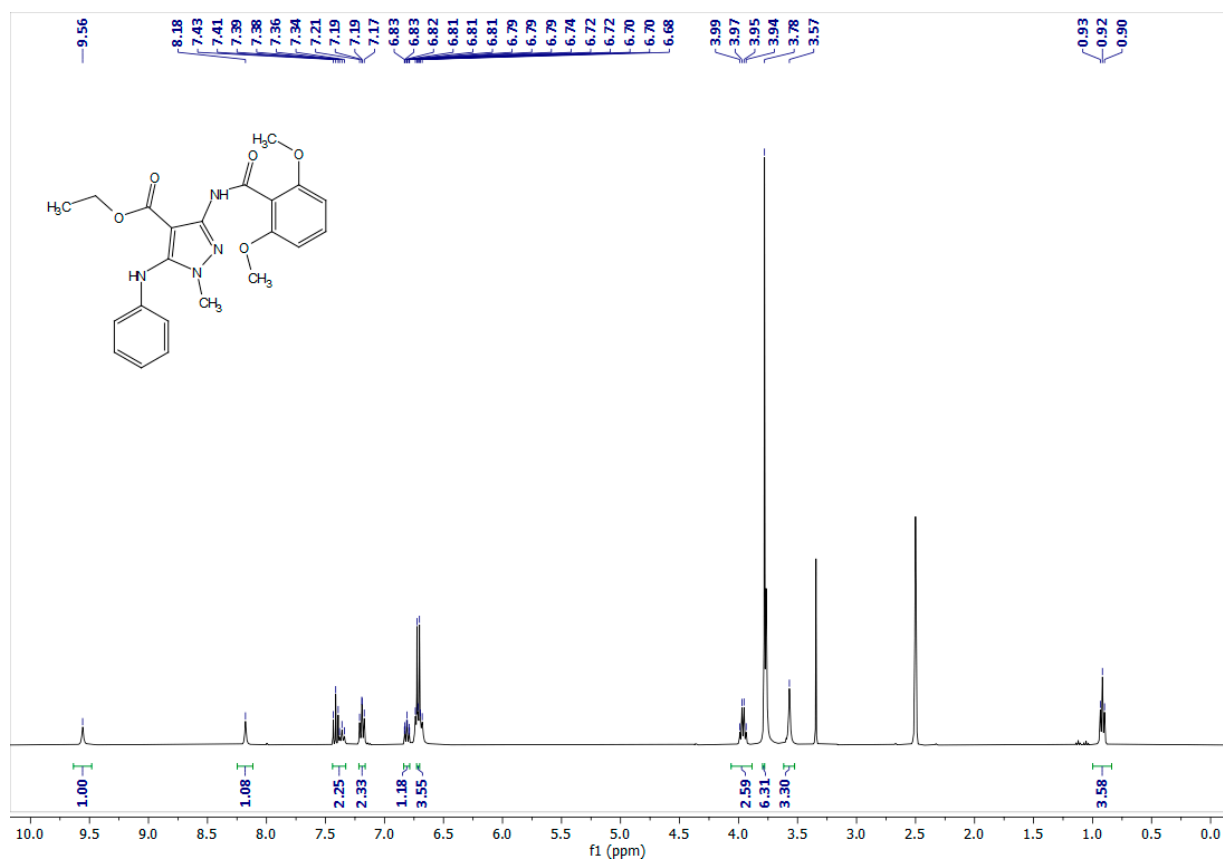

**Figure S40.**  $^{13}\text{C}$ -NMR (101 MHz,  $d_6$ -DMSO) spectrum of compound **20**

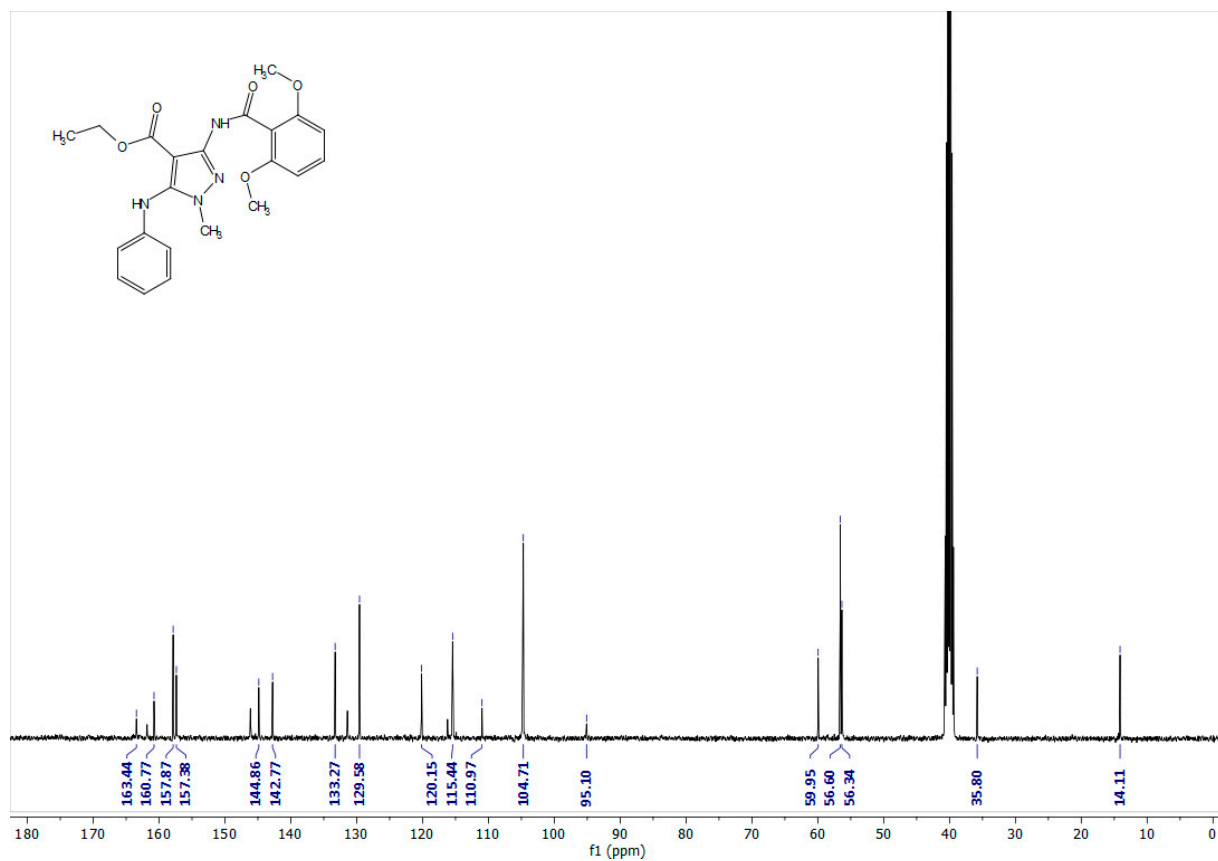

**Figure S41.**  $^1\text{H}$ -NMR (400 MHz,  $\text{d}_6$ -DMSO) spectrum of compound **21**

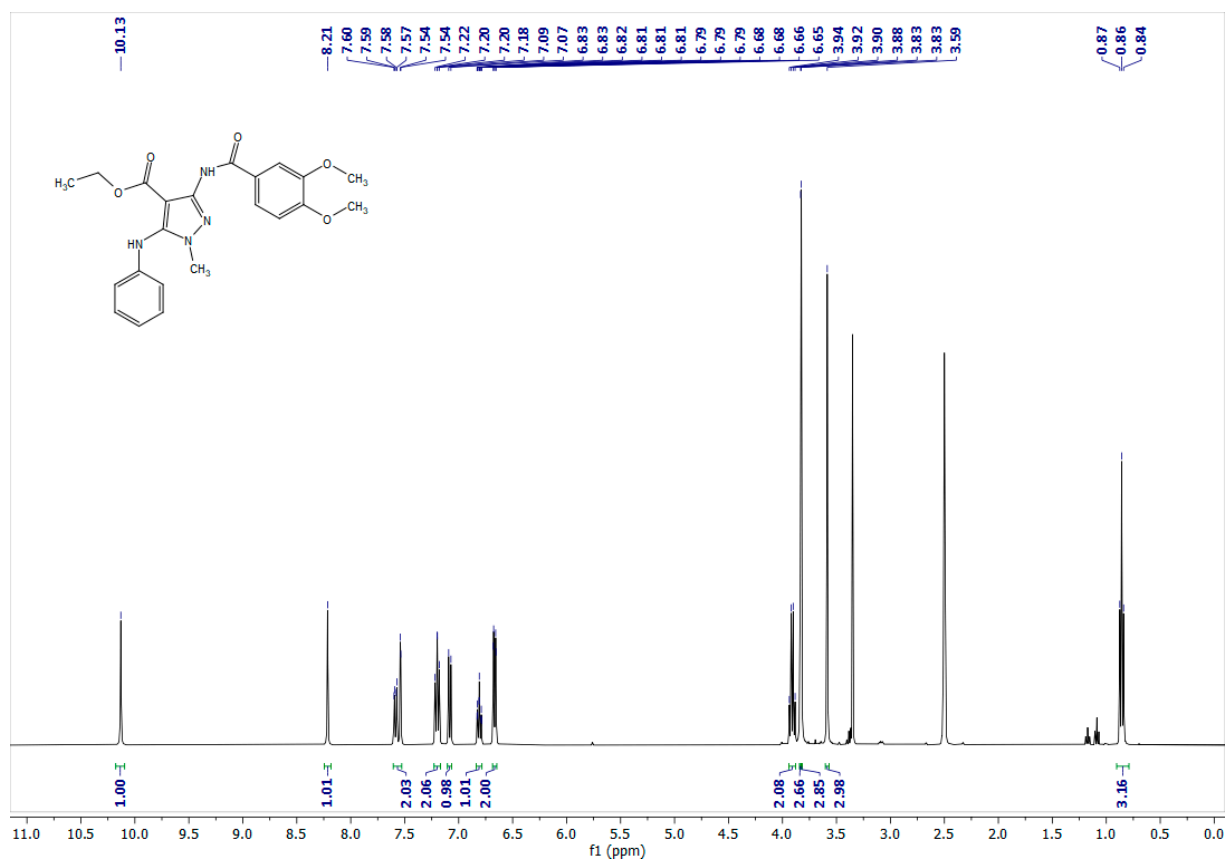

**Figure S42.**  $^{13}\text{C}$ -NMR (101 MHz,  $\text{d}_6$ -DMSO) spectrum of compound **21**

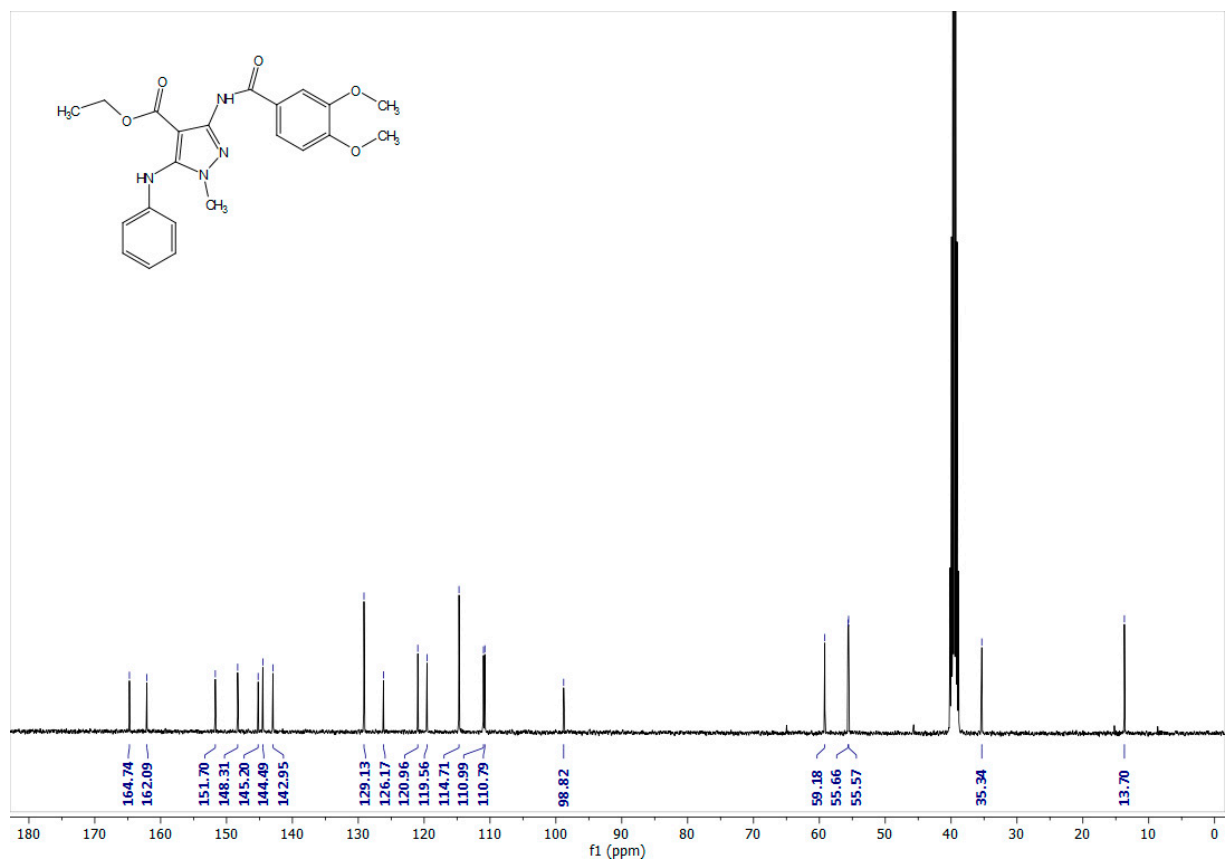

**Figure S43.**  $^1\text{H}$ -NMR (400 MHz,  $\text{d}_6$ -DMSO) spectrum of compound **22**

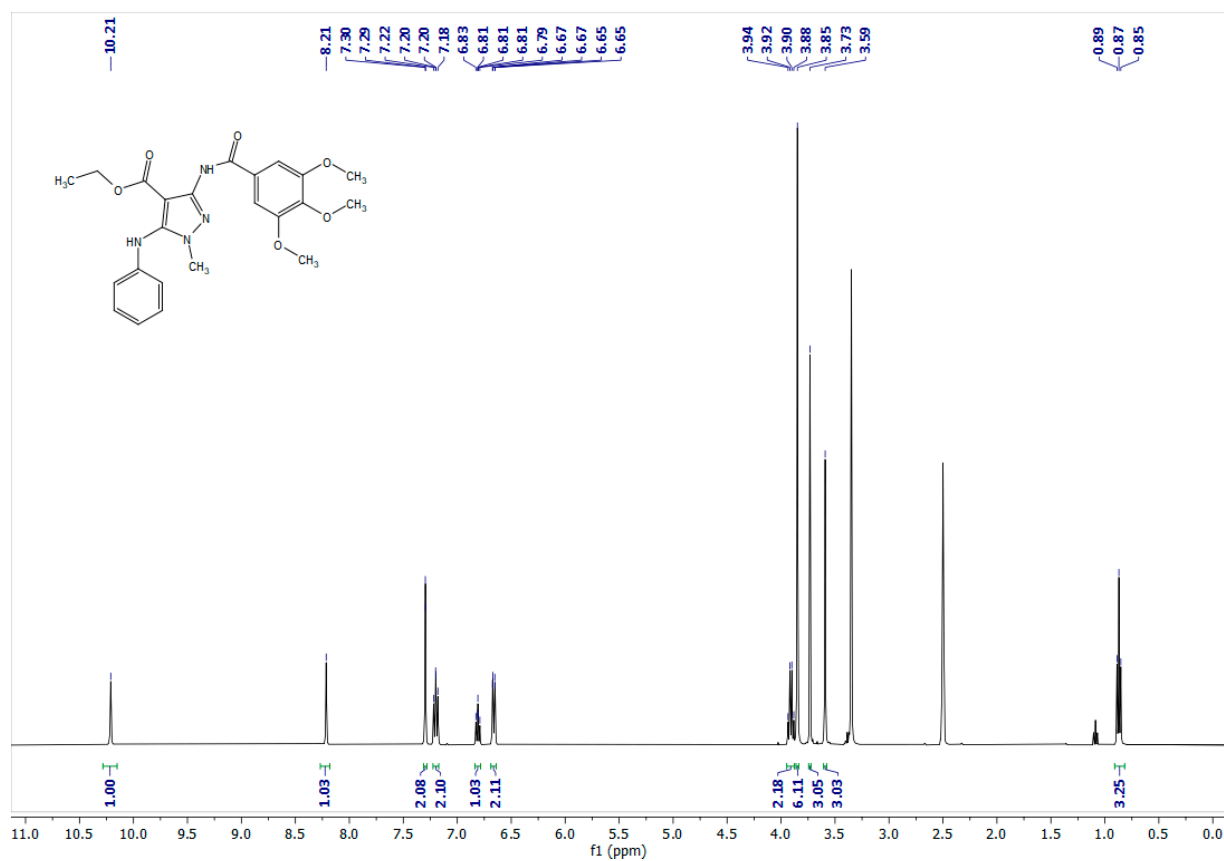

**Figure S44.**  $^{13}\text{C}$ -NMR (101 MHz,  $\text{d}_6$ -DMSO) spectrum of compound **22**

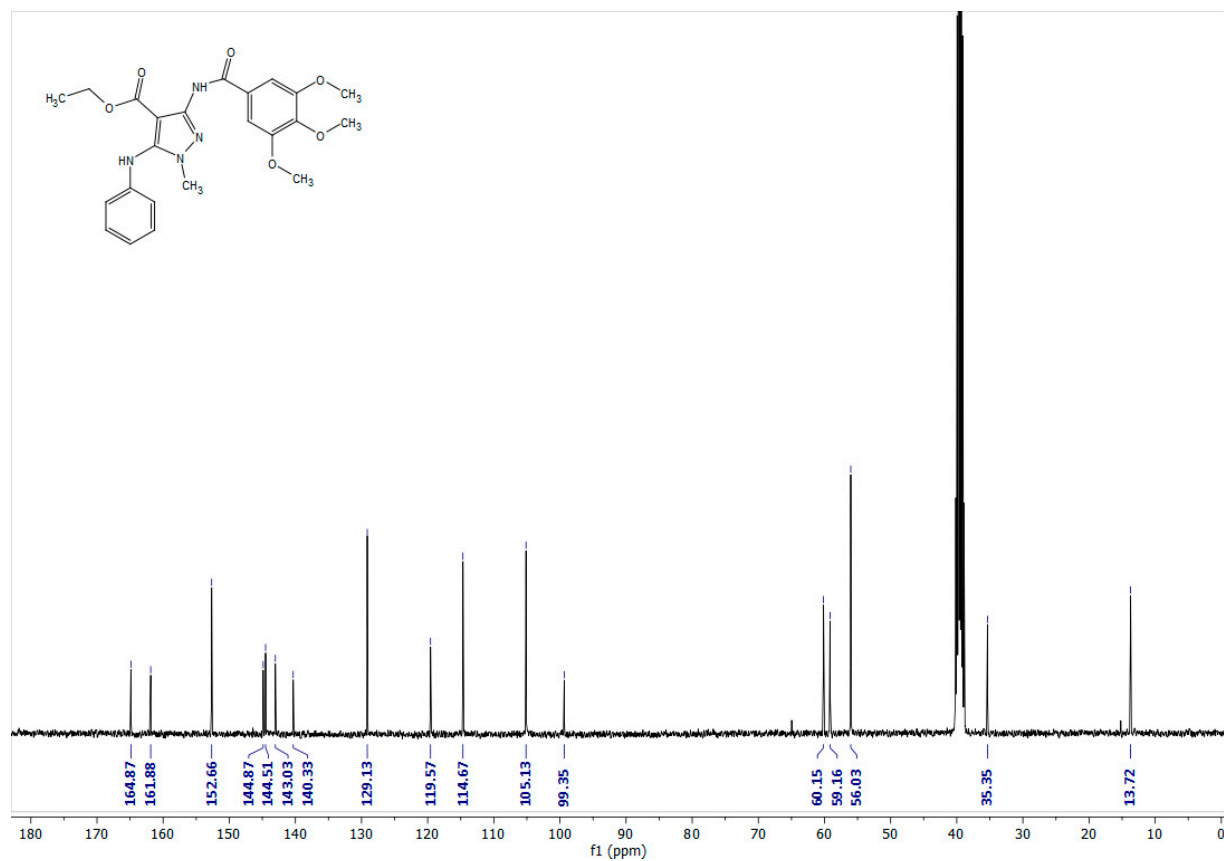

**Table S1.** Inhibitory effect of compounds **10-22** on platelet aggregation and ROS production

| <b>Cpd</b> | <b>IC<sub>50</sub> (μM±SD)<sup>a</sup></b> |                                  |
|------------|--------------------------------------------|----------------------------------|
|            | <b>Aggregation inhibition</b>              | <b>ROS production inhibition</b> |
| <b>10a</b> | 204±12                                     | 111±9                            |
| <b>10b</b> | 94±7                                       | 104±4                            |
| <b>11a</b> | 183±13                                     | 123±12                           |
| <b>11b</b> | 129±10                                     | 113±7                            |
| <b>11c</b> | 841±43                                     | 148±13                           |
| <b>11d</b> | 890±19                                     | 182±11                           |
| <b>12a</b> | 265±23                                     | 113±7                            |
| <b>12b</b> | 187±16                                     | 106±9                            |
| <b>12c</b> | 331±14                                     | 193±16                           |
| <b>12d</b> | 433±16                                     | 171±9                            |
| <b>13a</b> | 883±39                                     | 213±17                           |
| <b>13b</b> | 909±87                                     | 433±32                           |
| <b>13c</b> | 313±29                                     | 209±15                           |
| <b>13d</b> | 437±25                                     | 405±29                           |
| <b>14</b>  | 365±28                                     | 387±35                           |
| <b>15</b>  | 250±19                                     | 323±14                           |
| <b>16</b>  | 292±28                                     | 310±24                           |
| <b>17</b>  | 460±35                                     | 573±43                           |
| <b>18</b>  | 268±25                                     | 273±17                           |
| <b>19</b>  | 294±26                                     | 293±18                           |
| <b>20</b>  | 301±24                                     | 289±27                           |
| <b>21</b>  | 278±27                                     | 262±13                           |
| <b>22</b>  | 249±22                                     | 313±25                           |
| <b>NAC</b> | ND                                         | 872±26                           |
| <b>ASA</b> | 438±18                                     | ND                               |

<sup>a</sup>Reported data are the mean value ± standard deviation (SD) obtained in at least six different experiments each performed in duplicate.
